# Supplementary material for: Rapid Identification of Brucella Genus and Species In Silico and On-Site Using Novel Probes with CRISPR/Cas12a
Source: Microorganisms. 2024 May 17;12(5):1018. doi: 10.3390/microorganisms12051018 (PMC11124060; doi:10.3390/microorganisms12051018)
Supplement: Supplementary file 1 [file microorganisms-12-01018-s001.zip]

Archive with 4 entries (4 files):
- Supplemental  File S3 Tables S1-S5.xlsx
- Supplemental File S1 Figures S1-S10.pdf
- Supplemental File S2 GAMOSCE user manual  Figures S11-S14.pdf
- Supplemental File S2 gamosce V1.0.exe
