# Supplementary material for: Rapid Identification of Brucella Genus and Species In Silico and On-Site Using Novel Probes with CRISPR/Cas12a
Source: Microorganisms. 2024 May 17;12(5):1018. doi: 10.3390/microorganisms12051018 (PMC11124060; doi:10.3390/microorganisms12051018)
Supplement: Supplementary file 1 [file microorganisms-12-01018-s001.zip › Supplemental File S3 Tables S1-S5.xlsx]

## Sheet: A1a
Table S1a A breakdown of the 773 Brucella genomes used for SNP discovery of species specific targets
Species	Numbers
Brucella abortus	261
Brucella canis	29
Brucella ceti	10
Brucella inopinata	3
Brucella melitensis	356
Brucella microti	2
Brucella neotomae	6
Brucella ovis	17
Brucella pinnipedialis	6
Brucella suis	81
Brucella vulpis	2
Total	773

## Sheet: A1b
Table S1b The table of Assembly ID and the rename of the Brucella genus strains
Rename	Assembly ID	Rename	Assembly ID	Rename	Assembly ID	Rename	Assembly ID
Bmelitensis_001	GCA_000007125.1	Bmelitensis_201	GCA_006507365.1	Babortus_045	GCA_000366185.1	Babortus_245	GCA_003244395.2
Bmelitensis_002	GCA_000740415.1	Bmelitensis_202	GCA_006508025.1	Babortus_046	GCA_900446065.1	Babortus_246	GCA_000739335.1
Bmelitensis_003	GCA_003516085.1	Bmelitensis_203	GCA_006506835.1	Babortus_047	GCA_000366725.1	Babortus_247	GCA_001038665.1
Bmelitensis_004	GCA_002263015.1	Bmelitensis_204	GCA_006507345.1	Babortus_048	GCA_000366505.1	Babortus_248	GCA_000739315.1
Bmelitensis_005	GCA_000192885.1	Bmelitensis_205	GCA_006506965.1	Babortus_049	GCA_900446015.1	Babortus_249	GCA_000739325.1
Bmelitensis_006	GCA_002191455.1	Bmelitensis_206	GCA_006505895.1	Babortus_050	GCA_000366165.1	Babortus_250	GCA_016091955.1
Bmelitensis_007	GCA_002191655.1	Bmelitensis_207	GCA_006507425.1	Babortus_051	GCA_000366565.1	Babortus_251	GCA_001715505.1
Bmelitensis_008	GCA_002191335.1	Bmelitensis_208	GCA_006507905.1	Babortus_052	GCA_003989955.1	Babortus_252	GCA_000480235.1
Bmelitensis_009	GCA_002191615.1	Bmelitensis_209	GCA_006506815.1	Babortus_053	GCA_004137275.1	Babortus_253	GCA_000480255.1
Bmelitensis_010	GCA_002191675.1	Bmelitensis_210	GCA_006506005.1	Babortus_054	GCA_000413815.1	Babortus_254	GCA_004137325.1
Bmelitensis_011	GCA_002192095.1	Bmelitensis_211	GCA_006506095.1	Babortus_055	GCA_000413575.1	Babortus_255	GCA_003989715.1
Bmelitensis_012	GCA_002192155.1	Bmelitensis_212	GCA_006507585.1	Babortus_056	GCA_000413995.1	Babortus_256	GCA_003989965.1
Bmelitensis_013	GCA_002191295.1	Bmelitensis_213	GCA_006506625.1	Babortus_057	GCA_000742215.1	Babortus_257	GCA_000473805.1
Bmelitensis_014	GCA_002191755.1	Bmelitensis_214	GCA_006506025.1	Babortus_058	GCA_000413955.1	Babortus_258	GCA_004168605.1
Bmelitensis_015	GCA_004208655.1	Bmelitensis_215	GCA_003432005.1	Babortus_059	GCA_000413615.1	Babortus_259	GCA_003194825.1
Bmelitensis_016	GCA_008761595.1	Bmelitensis_216	GCA_003989875.1	Babortus_060	GCA_000413795.1	Babortus_260	GCA_004168645.1
Bmelitensis_017	GCA_004208675.1	Bmelitensis_217	GCA_003989885.1	Babortus_061	GCA_000413835.1	Babortus_261	GCA_003989975.1
Bmelitensis_018	GCA_004208695.1	Bmelitensis_218	GCA_003989895.1	Babortus_062	GCA_000413535.1	Bsuis_001	GCA_000007505.1
Bmelitensis_019	GCA_002763615.1	Bmelitensis_219	GCA_006507815.1	Babortus_063	GCA_000365745.1	Bsuis_002	GCA_000223195.1
Bmelitensis_020	GCA_002262955.1	Bmelitensis_220	GCA_001856295.1	Babortus_064	GCA_000366365.1	Bsuis_003	GCA_000740235.1
Bmelitensis_021	GCA_001431745.1	Bmelitensis_221	GCA_000209575.2	Babortus_065	GCA_000366685.1	Bsuis_004	GCA_014884485.1
Bmelitensis_022	GCA_000192725.1	Bmelitensis_222	GCA_006507105.1	Babortus_066	GCA_000366305.1	Bsuis_005	GCA_014884525.1
Bmelitensis_023	GCA_003205535.1	Bmelitensis_223	GCA_006506635.1	Babortus_067	GCA_000366765.1	Bsuis_006	GCA_000236255.1
Bmelitensis_024	GCA_003856415.1	Bmelitensis_224	GCA_006506975.1	Babortus_068	GCA_000370085.1	Bsuis_007	GCA_014884545.1
Bmelitensis_025	GCA_002191915.1	Bmelitensis_225	GCA_002204265.1	Babortus_069	GCA_000366785.1	Bsuis_008	GCA_014884565.1
Bmelitensis_026	GCA_002191235.1	Bmelitensis_226	GCA_900417235.1	Babortus_070	GCA_000366705.1	Bsuis_009	GCA_001715425.1
Bmelitensis_027	GCA_002191575.1	Bmelitensis_227	GCA_900417255.1	Babortus_071	GCA_000413595.1	Bsuis_010	GCA_000875695.1
Bmelitensis_028	GCA_003516065.1	Bmelitensis_228	GCA_006507675.1	Babortus_072	GCA_000414015.1	Bsuis_011	GCA_000600055.1
Bmelitensis_029	GCA_003516045.1	Bmelitensis_229	GCA_006507445.1	Babortus_073	GCA_000413555.1	Bsuis_012	GCA_002749475.1
Bmelitensis_030	GCA_000022625.1	Bmelitensis_230	GCA_006506205.1	Babortus_074	GCA_000413675.1	Bsuis_013	GCA_000740255.1
Bmelitensis_031	GCA_002895105.1	Bmelitensis_231	GCA_006506935.1	Babortus_075	GCA_000366605.1	Bsuis_014	GCA_000698325.1
Bmelitensis_032	GCA_001307475.2	Bmelitensis_232	GCA_006506785.1	Babortus_076	GCA_000366665.1	Bsuis_015	GCA_000698345.1
Bmelitensis_033	GCA_002191375.1	Bmelitensis_233	GCA_006507185.1	Babortus_077	GCA_000365685.1	Bsuis_016	GCA_000698285.1
Bmelitensis_034	GCA_002191355.1	Bmelitensis_234	GCA_006507295.1	Babortus_078	GCA_000366445.1	Bsuis_017	GCA_000698245.1
Bmelitensis_035	GCA_001715485.1	Bmelitensis_235	GCA_006507965.1	Babortus_079	GCA_000366145.1	Bsuis_018	GCA_000699025.1
Bmelitensis_036	GCA_002895125.1	Bmelitensis_236	GCA_006507975.1	Babortus_080	GCA_000366805.1	Bsuis_019	GCA_014884405.1
Bmelitensis_037	GCA_000740355.1	Bmelitensis_237	GCA_006508035.1	Babortus_081	GCA_000366745.1	Bsuis_020	GCA_000018905.1
Bmelitensis_038	GCA_002953595.1	Bmelitensis_238	GCA_006517315.1	Babortus_082	GCA_000413695.1	Bsuis_021	GCA_000740435.1
Bmelitensis_039	GCA_008761615.1	Bmelitensis_239	GCA_006506125.1	Babortus_083	GCA_000370525.1	Bsuis_022	GCA_014884505.1
Bmelitensis_040	GCA_000227645.1	Bmelitensis_240	GCA_006506135.1	Babortus_084	GCA_000366485.1	Bsuis_023	GCA_001594165.1
Bmelitensis_041	GCA_900236585.1	Bmelitensis_241	GCA_006507495.1	Babortus_085	GCA_000370545.1	Bsuis_024	GCA_900460605.1
Bmelitensis_042	GCA_900236425.1	Bmelitensis_242	GCA_006506925.1	Babortus_086	GCA_000365825.1	Bsuis_025	GCA_000742005.1
Bmelitensis_043	GCA_900236375.1	Bmelitensis_243	GCA_000209595.2	Babortus_087	GCA_000365785.1	Bsuis_026	GCA_904066065.1
Bmelitensis_044	GCA_900236485.1	Bmelitensis_244	GCA_006506295.1	Babortus_088	GCA_000365725.1	Bsuis_027	GCA_904066055.1
Bmelitensis_045	GCA_900236495.1	Bmelitensis_245	GCA_006506215.1	Babortus_089	GCA_000366325.1	Bsuis_028	GCA_904066075.1
Bmelitensis_046	GCA_900236535.1	Bmelitensis_246	GCA_006507375.1	Babortus_090	GCA_000370225.1	Bsuis_029	GCA_904066045.1
Bmelitensis_047	GCA_900236365.1	Bmelitensis_247	GCA_006506855.1	Babortus_091	GCA_000366125.1	Bsuis_030	GCA_000366225.1
Bmelitensis_048	GCA_900236395.1	Bmelitensis_248	GCA_006506745.1	Babortus_092	GCA_000365605.1	Bsuis_031	GCA_000742055.1
Bmelitensis_049	GCA_900236415.1	Bmelitensis_249	GCA_006507075.1	Babortus_093	GCA_000413735.1	Bsuis_032	GCA_000480055.1
Bmelitensis_050	GCA_900236455.1	Bmelitensis_250	GCA_006507245.1	Babortus_094	GCA_000370285.1	Bsuis_033	GCA_000371165.1
Bmelitensis_051	GCA_900236545.1	Bmelitensis_251	GCA_006507665.1	Babortus_095	GCA_000365805.1	Bsuis_034	GCA_000371125.1
Bmelitensis_052	GCA_900236405.1	Bmelitensis_252	GCA_006507915.1	Babortus_096	GCA_000413495.1	Bsuis_035	GCA_000371225.1
Bmelitensis_053	GCA_900236575.1	Bmelitensis_253	GCA_006508005.1	Babortus_097	GCA_000479995.1	Bsuis_036	GCA_000480315.1
Bmelitensis_054	GCA_900236435.1	Bmelitensis_254	GCA_006507235.1	Babortus_098	GCA_000413775.1	Bsuis_037	GCA_000365705.1
Bmelitensis_055	GCA_900236385.1	Bmelitensis_255	GCA_900417245.1	Babortus_099	GCA_000413715.1	Bsuis_038	GCA_000365585.1
Bmelitensis_056	GCA_900236445.1	Bmelitensis_256	GCA_001856285.1	Babortus_100	GCA_000366465.1	Bsuis_039	GCA_000366085.1
Bmelitensis_057	GCA_900236525.1	Bmelitensis_257	GCA_006507555.1	Babortus_101	GCA_000370505.1	Bsuis_040	GCA_900446145.1
Bmelitensis_058	GCA_900236565.1	Bmelitensis_258	GCA_001608425.1	Babortus_102	GCA_000182625.1	Bsuis_041	GCA_000741995.1
Bmelitensis_059	GCA_900236345.1	Bmelitensis_259	GCA_006517295.1	Babortus_103	GCA_000365645.1	Bsuis_042	GCA_000371205.1
Bmelitensis_060	GCA_900236515.1	Bmelitensis_260	GCA_006506385.1	Babortus_104	GCA_000365625.1	Bsuis_043	GCA_000366265.1
Bmelitensis_061	GCA_900236335.1	Bmelitensis_261	GCA_006506425.1	Babortus_105	GCA_000366285.1	Bsuis_044	GCA_000366205.1
Bmelitensis_062	GCA_900236355.1	Bmelitensis_262	GCA_006506875.1	Babortus_106	GCA_000413755.1	Bsuis_045	GCA_000371085.1
Bmelitensis_063	GCA_900236555.1	Bmelitensis_263	GCA_006506225.1	Babortus_107	GCA_000413635.1	Bsuis_046	GCA_000480035.1
Bmelitensis_064	GCA_900236465.1	Bmelitensis_264	GCA_006507175.1	Babortus_108	GCA_000366345.1	Bsuis_047	GCA_000371145.1
Bmelitensis_065	GCA_000740395.1	Bmelitensis_265	GCA_001307445.1	Babortus_109	GCA_000366405.1	Bsuis_048	GCA_003994045.1
Bmelitensis_066	GCA_002191495.1	Bmelitensis_266	GCA_006507135.1	Babortus_110	GCA_000370045.1	Bsuis_049	GCA_000371305.1
Bmelitensis_067	GCA_002191535.1	Bmelitensis_267	GCA_002245225.1	Babortus_111	GCA_000366545.1	Bsuis_050	GCA_000366245.1
Bmelitensis_068	GCA_002191255.1	Bmelitensis_268	GCA_000366925.1	Babortus_112	GCA_000366525.1	Bsuis_051	GCA_000371185.1
Bmelitensis_069	GCA_002192075.1	Bmelitensis_269	GCA_001702255.1	Babortus_113	GCA_000370205.1	Bsuis_052	GCA_000209635.2
Bmelitensis_070	GCA_002192035.1	Bmelitensis_270	GCA_000209615.2	Babortus_114	GCA_000413655.1	Bsuis_053	GCA_000371105.1
Bmelitensis_071	GCA_002191835.1	Bmelitensis_271	GCA_900417195.1	Babortus_115	GCA_000370245.1	Bsuis_054	GCA_000371245.1
Bmelitensis_072	GCA_002192015.1	Bmelitensis_272	GCA_900417225.1	Babortus_116	GCA_000399725.1	Bsuis_055	GCA_000371265.1
Bmelitensis_073	GCA_002191815.1	Bmelitensis_273	GCA_006505935.1	Babortus_117	GCA_000369905.1	Bsuis_056	GCA_000371325.1
Bmelitensis_074	GCA_002191635.1	Bmelitensis_274	GCA_006507125.1	Babortus_118	GCA_000478665.1	Bsuis_057	GCA_000365565.1
Bmelitensis_075	GCA_002192115.1	Bmelitensis_275	GCA_006507765.1	Babortus_119	GCA_000370305.1	Bsuis_058	GCA_000480135.1
Bmelitensis_076	GCA_002191775.1	Bmelitensis_276	GCA_006517335.1	Babortus_120	GCA_000366385.1	Bsuis_059	GCA_000371285.1
Bmelitensis_077	GCA_002192055.1	Bmelitensis_277	GCA_006507565.1	Babortus_121	GCA_000365665.1	Bsuis_060	GCA_000160275.1
Bmelitensis_078	GCA_002192135.1	Bmelitensis_278	GCA_002204335.1	Babortus_122	GCA_000413975.1	Bsuis_061	GCA_000480155.1
Bmelitensis_079	GCA_002191315.1	Bmelitensis_279	GCA_001702375.1	Babortus_123	GCA_000480175.1	Bsuis_062	GCA_003994175.1
Bmelitensis_080	GCA_002192175.1	Bmelitensis_280	GCA_006506515.1	Babortus_124	GCA_000366425.1	Bsuis_063	GCA_004684165.1
Bmelitensis_081	GCA_002191275.1	Bmelitensis_281	GCA_006507325.1	Babortus_125	GCA_000370025.1	Bsuis_064	GCA_003194855.1
Bmelitensis_082	GCA_002191415.1	Bmelitensis_282	GCA_006517325.1	Babortus_126	GCA_000369985.1	Bsuis_065	GCA_000292125.1
Bmelitensis_083	GCA_002191795.1	Bmelitensis_283	GCA_006505995.1	Babortus_127	GCA_000369925.1	Bsuis_066	GCA_900446155.1
Bmelitensis_084	GCA_002191855.1	Bmelitensis_284	GCA_006507015.1	Babortus_128	GCA_000370565.1	Bsuis_067	GCA_000157755.1
Bmelitensis_085	GCA_002191515.1	Bmelitensis_285	GCA_006506395.1	Babortus_129	GCA_000370425.1	Bsuis_068	GCA_000157775.1
Bmelitensis_086	GCA_002191595.1	Bmelitensis_286	GCA_001307425.1	Babortus_130	GCA_000365765.1	Bsuis_069	GCA_000292105.2
Bmelitensis_087	GCA_001715465.1	Bmelitensis_287	GCA_006508015.1	Babortus_131	GCA_000370165.1	Bsuis_070	GCA_000292005.2
Bmelitensis_088	GCA_002191735.1	Bmelitensis_288	GCA_001702315.1	Babortus_132	GCA_000370125.1	Bsuis_071	GCA_000755105.1
Bmelitensis_089	GCA_002191935.1	Bmelitensis_289	GCA_002204295.1	Babortus_133	GCA_000479955.1	Bsuis_072	GCA_000755085.1
Bmelitensis_090	GCA_002191895.1	Bmelitensis_290	GCA_006507465.1	Babortus_134	GCA_000370185.1	Bsuis_073	GCA_009218085.1
Bmelitensis_091	GCA_002191475.1	Bmelitensis_291	GCA_006507695.1	Babortus_135	GCA_001401915.1	Bsuis_074	GCA_014884465.1
Bmelitensis_092	GCA_002191995.1	Bmelitensis_292	GCA_002245235.1	Babortus_136	GCA_001402075.1	Bsuis_075	GCA_014884585.1
Bmelitensis_093	GCA_002191435.1	Bmelitensis_293	GCA_006507065.1	Babortus_137	GCA_000398805.1	Bsuis_076	GCA_014884425.1
Bmelitensis_094	GCA_002192195.1	Bmelitensis_294	GCA_006507285.1	Babortus_138	GCA_000370105.1	Bsuis_077	GCA_014884445.1
Bmelitensis_095	GCA_002191875.1	Bmelitensis_295	GCA_006507945.1	Babortus_139	GCA_000370265.1	Bsuis_078	GCA_001908355.1
Bmelitensis_096	GCA_002191395.1	Bmelitensis_296	GCA_002245205.1	Babortus_140	GCA_001401935.1	Bsuis_079	GCA_000701065.1
Bmelitensis_097	GCA_002191695.1	Bmelitensis_297	GCA_006506735.1	Babortus_141	GCA_001401945.1	Bsuis_080	GCA_000661995.2
Bmelitensis_098	GCA_002191715.1	Bmelitensis_298	GCA_006506545.1	Babortus_142	GCA_001402055.1	Bsuis_081	GCA_000331635.1
Bmelitensis_099	GCA_002191555.1	Bmelitensis_299	GCA_000370745.1	Babortus_143	GCA_001402005.1	Bcanis_001	GCA_000018525.1
Bmelitensis_100	GCA_000160295.1	Bmelitensis_300	GCA_002204345.1	Babortus_144	GCA_001402095.1	Bcanis_002	GCA_000740335.1
Bmelitensis_101	GCA_000250795.2	Bmelitensis_301	GCA_006506565.1	Babortus_145	GCA_000370325.1	Bcanis_003	GCA_000238195.1
Bmelitensis_102	GCA_002871075.1	Bmelitensis_302	GCA_006507225.1	Babortus_146	GCA_000742195.1	Bcanis_004	GCA_003010715.1
Bmelitensis_103	GCA_900446095.1	Bmelitensis_303	GCA_006505925.1	Babortus_147	GCA_000370345.1	Bcanis_005	GCA_000691585.1
Bmelitensis_104	GCA_000365865.1	Bmelitensis_304	GCA_000182235.1	Babortus_148	GCA_000245935.1	Bcanis_006	GCA_001715405.1
Bmelitensis_105	GCA_000366885.1	Bmelitensis_305	GCA_006506485.1	Babortus_149	GCA_000245915.1	Bcanis_007	GCA_002591255.1
Bmelitensis_106	GCA_000366625.1	Bmelitensis_306	GCA_006507335.1	Babortus_150	GCA_000370005.1	Bcanis_008	GCA_001715365.1
Bmelitensis_107	GCA_000370765.1	Bmelitensis_307	GCA_000250835.2	Babortus_151	GCA_000370365.1	Bcanis_009	GCA_001715445.1
Bmelitensis_108	GCA_000366985.1	Bmelitensis_308	GCA_000158695.1	Babortus_152	GCA_000369965.1	Bcanis_010	GCA_000530495.1
Bmelitensis_109	GCA_000370825.1	Bmelitensis_309	GCA_000250775.2	Babortus_153	GCA_000370385.1	Bcanis_011	GCA_000367265.1
Bmelitensis_110	GCA_000370805.1	Bmelitensis_310	GCA_000250815.2	Babortus_154	GCA_000370405.1	Bcanis_012	GCA_000367285.1
Bmelitensis_111	GCA_000370725.1	Bmelitensis_311	GCA_000292065.1	Babortus_155	GCA_000245875.1	Bcanis_013	GCA_000366825.1
Bmelitensis_112	GCA_000370665.1	Bmelitensis_312	GCA_000348645.1	Babortus_156	GCA_000370145.1	Bcanis_014	GCA_000480275.1
Bmelitensis_113	GCA_000988815.1	Bmelitensis_313	GCA_006507165.1	Babortus_157	GCA_000370445.1	Bcanis_015	GCA_000480295.1
Bmelitensis_114	GCA_000370785.1	Bmelitensis_314	GCA_000685375.1	Babortus_158	GCA_001856265.1	Bcanis_016	GCA_000370585.1
Bmelitensis_115	GCA_000367025.1	Bmelitensis_315	GCA_000158735.1	Babortus_159	GCA_001856205.1	Bcanis_017	GCA_000370605.1
Bmelitensis_116	GCA_000367045.1	Bmelitensis_316	GCA_000298615.1	Babortus_160	GCA_000245975.1	Bcanis_018	GCA_000367305.1
Bmelitensis_117	GCA_000366905.1	Bmelitensis_317	GCA_000292085.2	Babortus_161	GCA_003994025.1	Bcanis_019	GCA_001758265.1
Bmelitensis_118	GCA_000370845.1	Bmelitensis_318	GCA_000298595.1	Babortus_162	GCA_000245835.1	Bcanis_020	GCA_900491925.1
Bmelitensis_119	GCA_000370865.1	Bmelitensis_319	GCA_000292165.2	Babortus_163	GCA_000366105.1	Bcanis_021	GCA_900491905.1
Bmelitensis_120	GCA_000370625.1	Bmelitensis_320	GCA_006506675.1	Babortus_164	GCA_000370465.1	Bcanis_022	GCA_900491895.1
Bmelitensis_121	GCA_003991385.1	Bmelitensis_321	GCA_009017395.1	Babortus_165	GCA_000245955.1	Bcanis_023	GCA_900491915.1
Bmelitensis_122	GCA_000370705.1	Bmelitensis_322	GCA_009017355.1	Babortus_166	GCA_003994155.1	Bcanis_024	GCA_900497665.1
Bmelitensis_123	GCA_006507875.1	Bmelitensis_323	GCA_002214285.1	Babortus_167	GCA_004704905.2	Bcanis_025	GCA_001078335.1
Bmelitensis_124	GCA_006506575.1	Bmelitensis_324	GCA_002290125.1	Babortus_168	GCA_003194755.1	Bcanis_026	GCA_004127195.1
Bmelitensis_125	GCA_006507745.1	Bmelitensis_325	GCA_900446075.1	Babortus_169	GCA_003194805.1	Bcanis_027	GCA_000292185.2
Bmelitensis_126	GCA_006507855.1	Bmelitensis_326	GCA_000444515.1	Babortus_170	GCA_003994075.1	Bcanis_028	GCA_000298575.1
Bmelitensis_127	GCA_000367005.1	Bmelitensis_327	GCA_000938035.1	Babortus_171	GCA_001401925.1	Bcanis_029	GCA_004127225.1
Bmelitensis_128	GCA_900446035.1	Bmelitensis_328	GCA_000940435.1	Babortus_172	GCA_001856215.1	Bceti_001	GCA_000590795.1
Bmelitensis_129	GCA_000370645.1	Bmelitensis_329	GCA_002266765.1	Babortus_173	GCA_001856305.1	Bceti_002	GCA_000590815.1
Bmelitensis_130	GCA_000365845.1	Bmelitensis_330	GCA_001302545.1	Babortus_174	GCA_001856195.1	Bceti_003	GCA_000158775.1
Bmelitensis_131	GCA_000370685.1	Bmelitensis_331	GCA_001302495.1	Babortus_175	GCA_003194765.1	Bceti_004	GCA_000662035.2
Bmelitensis_132	GCA_000366585.1	Bmelitensis_332	GCA_002266745.1	Babortus_176	GCA_003194795.1	Bceti_005	GCA_000182425.1
Bmelitensis_133	GCA_006507685.1	Bmelitensis_333	GCA_002278715.1	Babortus_177	GCA_001401995.1	Bceti_006	GCA_002245555.1
Bmelitensis_134	GCA_000366865.1	Bmelitensis_334	GCA_002278695.1	Babortus_178	GCA_001402025.1	Bceti_007	GCA_014193785.1
Bmelitensis_135	GCA_000480215.1	Bmelitensis_335	GCA_002266775.1	Babortus_179	GCA_001402105.1	Bceti_008	GCA_000157835.1
Bmelitensis_136	GCA_006506725.1	Bmelitensis_336	GCA_001857585.1	Babortus_180	GCA_009789365.1	Bceti_009	GCA_000157855.1
Bmelitensis_137	GCA_006507825.1	Bmelitensis_337	GCA_002278575.1	Babortus_181	GCA_000370485.1	Bceti_010	GCA_000158755.1
Bmelitensis_138	GCA_009823695.1	Bmelitensis_338	GCA_002278735.1	Babortus_182	GCA_000480115.1	Binopinata_001	GCA_900095155.1
Bmelitensis_139	GCA_000366965.1	Bmelitensis_339	GCA_002631235.1	Babortus_183	GCA_000480075.1	Binopinata_002	GCA_000182725.1
Bmelitensis_140	GCA_003989635.1	Bmelitensis_340	GCA_002278675.1	Babortus_184	GCA_000245855.1	Binopinata_003	GCA_000662015.2
Bmelitensis_141	GCA_009789435.1	Bmelitensis_341	GCA_002266785.1	Babortus_185	GCA_001856185.1	Bmicroti_001	GCA_000022745.1
Bmelitensis_142	GCA_009789335.1	Bmelitensis_342	GCA_003452115.1	Babortus_186	GCA_001856345.1	Bmicroti_002	GCA_902807045.1
Bmelitensis_143	GCA_009789305.1	Bmelitensis_343	GCA_003457115.1	Babortus_187	GCA_000742275.1	Bneotomae_001	GCA_900446125.1
Bmelitensis_144	GCA_009789295.1	Bmelitensis_344	GCA_002278585.1	Babortus_188	GCA_000245895.1	Bneotomae_002	GCA_000742255.1
Bmelitensis_145	GCA_009789415.1	Bmelitensis_345	GCA_000705115.1	Babortus_189	GCA_000160255.1	Bneotomae_003	GCA_000158715.1
Bmelitensis_146	GCA_009789395.1	Bmelitensis_346	GCA_003452125.1	Babortus_190	GCA_013425785.1	Bneotomae_004	GCA_000712255.2
Bmelitensis_147	GCA_009789345.1	Bmelitensis_347	GCA_003514625.1	Babortus_191	GCA_009733465.1	Bneotomae_005	GCA_900446115.1
Bmelitensis_148	GCA_000480095.1	Bmelitensis_348	GCA_003538745.1	Babortus_192	GCA_009733365.1	Bneotomae_006	GCA_900446105.1
Bmelitensis_149	GCA_000479975.1	Bmelitensis_349	GCA_003514345.1	Babortus_193	GCA_000472245.1	Bovis_001	GCA_000016845.1
Bmelitensis_150	GCA_003994105.1	Bmelitensis_350	GCA_001302525.1	Babortus_194	GCA_009733205.1	Bovis_002	GCA_900446135.1
Bmelitensis_151	GCA_003993875.1	Bmelitensis_351	GCA_000705095.1	Babortus_195	GCA_009733195.1	Bovis_003	GCA_000366045.1
Bmelitensis_152	GCA_003993905.1	Bmelitensis_352	GCA_000714755.1	Babortus_196	GCA_000370065.1	Bovis_004	GCA_000365965.1
Bmelitensis_153	GCA_000366845.1	Bmelitensis_353	GCA_001302485.1	Babortus_197	GCA_001267725.1	Bovis_005	GCA_000365985.1
Bmelitensis_154	GCA_006517305.1	Bmelitensis_354	GCA_000591005.1	Babortus_198	GCA_009733435.1	Bovis_006	GCA_000370905.1
Bmelitensis_155	GCA_009797905.1	Bmelitensis_355	GCA_000331655.1	Babortus_199	GCA_003965945.1	Bovis_007	GCA_000370885.1
Bmelitensis_156	GCA_009823705.1	Bmelitensis_356	GCA_016411965.1	Babortus_200	GCA_009733215.1	Bovis_008	GCA_000371345.1
Bmelitensis_157	GCA_003993825.1	Babortus_001	GCA_000054005.1	Babortus_201	GCA_009733285.1	Bovis_009	GCA_000365925.1
Bmelitensis_158	GCA_003993995.1	Babortus_002	GCA_000740135.1	Babortus_202	GCA_000157695.1	Bovis_010	GCA_000366005.1
Bmelitensis_159	GCA_003993855.1	Babortus_003	GCA_000740155.1	Babortus_203	GCA_009733255.1	Bovis_011	GCA_000367065.1
Bmelitensis_160	GCA_003994095.1	Babortus_004	GCA_016107505.1	Babortus_204	GCA_016091965.1	Bovis_012	GCA_000365905.1
Bmelitensis_161	GCA_003993965.1	Babortus_005	GCA_000740315.1	Babortus_205	GCA_004137225.1	Bovis_013	GCA_000365885.1
Bmelitensis_162	GCA_003993935.1	Babortus_006	GCA_000740295.1	Babortus_206	GCA_009733455.1	Bovis_014	GCA_000367085.1
Bmelitensis_163	GCA_003994205.1	Babortus_007	GCA_000008145.1	Babortus_207	GCA_009733495.1	Bovis_015	GCA_000365945.1
Bmelitensis_164	GCA_003993955.1	Babortus_008	GCA_002895145.1	Babortus_208	GCA_009728185.1	Bovis_016	GCA_000366065.1
Bmelitensis_165	GCA_003994185.1	Babortus_009	GCA_000740195.1	Babortus_209	GCA_009789215.1	Bovis_017	GCA_000413515.1
Bmelitensis_166	GCA_003994115.1	Babortus_010	GCA_000740215.1	Babortus_210	GCA_003984745.1	Bpinnipedialis_001	GCA_000740275.1
Bmelitensis_167	GCA_003994015.1	Babortus_011	GCA_003290345.1	Babortus_211	GCA_003965935.1	Bpinnipedialis_002	GCA_000221005.1
Bmelitensis_168	GCA_003993895.1	Babortus_012	GCA_000740375.1	Babortus_212	GCA_003989725.1	Bpinnipedialis_003	GCA_015624465.1
Bmelitensis_169	GCA_001856365.1	Babortus_013	GCA_000238175.1	Babortus_213	GCA_009733175.1	Bpinnipedialis_004	GCA_000157815.1
Bmelitensis_170	GCA_001702305.1	Babortus_014	GCA_000740175.1	Babortus_214	GCA_003989905.1	Bpinnipedialis_005	GCA_000158675.1
Bmelitensis_171	GCA_006507645.1	Babortus_015	GCA_001296965.1	Babortus_215	GCA_000158795.1	Bpinnipedialis_006	GCA_000157795.1
Bmelitensis_172	GCA_006507475.1	Babortus_016	GCA_000018725.1	Babortus_216	GCA_009728165.1	Bvulpis_001	GCA_900000005.1
Bmelitensis_173	GCA_900446085.1	Babortus_017	GCA_011801185.1	Babortus_217	GCA_003984755.1	Bvulpis_002	GCA_001511795.1
Bmelitensis_174	GCA_000366945.1	Babortus_018	GCA_008761575.1	Babortus_218	GCA_009733335.1
Bmelitensis_175	GCA_900417205.1	Babortus_019	GCA_001043295.1	Babortus_219	GCA_000157675.1
Bmelitensis_176	GCA_009789465.1	Babortus_020	GCA_002262975.1	Babortus_220	GCA_000157715.1
Bmelitensis_177	GCA_006506995.1	Babortus_021	GCA_002262995.1	Babortus_221	GCA_009733375.1
Bmelitensis_178	GCA_009789445.1	Babortus_022	GCA_003675365.1	Babortus_222	GCA_000477635.1
Bmelitensis_179	GCA_014270005.1	Babortus_023	GCA_000740945.1	Babortus_223	GCA_000292045.1
Bmelitensis_180	GCA_001702335.1	Babortus_024	GCA_900095085.1	Babortus_224	GCA_009733275.1
Bmelitensis_181	GCA_006506665.1	Babortus_025	GCA_002290705.1	Babortus_225	GCA_000163115.1
Bmelitensis_182	GCA_006506465.1	Babortus_026	GCA_002290805.1	Babortus_226	GCA_000157735.1
Bmelitensis_183	GCA_900417215.1	Babortus_027	GCA_002290725.1	Babortus_227	GCA_000298635.1
Bmelitensis_184	GCA_001608355.1	Babortus_028	GCA_002290685.1	Babortus_228	GCA_000292025.2
Bmelitensis_185	GCA_006507545.1	Babortus_029	GCA_002310355.1	Babortus_229	GCA_001940595.1
Bmelitensis_186	GCA_006506195.1	Babortus_030	GCA_002291345.1	Babortus_230	GCA_000292205.2
Bmelitensis_187	GCA_006506895.1	Babortus_031	GCA_002290785.1	Babortus_231	GCA_000292145.2
Bmelitensis_188	GCA_006506235.1	Babortus_032	GCA_002291245.1	Babortus_232	GCA_001866335.1
Bmelitensis_189	GCA_006506985.1	Babortus_033	GCA_002291325.1	Babortus_233	GCA_002291365.1
Bmelitensis_190	GCA_006507455.1	Babortus_034	GCA_002290765.1	Babortus_234	GCA_002291225.1
Bmelitensis_191	GCA_006507595.1	Babortus_035	GCA_002291285.1	Babortus_235	GCA_002291305.1
Bmelitensis_192	GCA_006507775.1	Babortus_036	GCA_003994435.1	Babortus_236	GCA_002291385.1
Bmelitensis_193	GCA_006506435.1	Babortus_037	GCA_002290665.1	Babortus_237	GCA_000755125.1
Bmelitensis_194	GCA_006506105.1	Babortus_038	GCA_900446005.1	Babortus_238	GCA_002291205.1
Bmelitensis_195	GCA_006506035.1	Babortus_039	GCA_000369945.1	Babortus_239	GCA_002290745.1
Bmelitensis_196	GCA_006506115.1	Babortus_040	GCA_900446045.1	Babortus_240	GCA_003194885.1
Bmelitensis_197	GCA_006506505.1	Babortus_041	GCA_000366025.1	Babortus_241	GCA_003194895.1
Bmelitensis_198	GCA_006506605.1	Babortus_042	GCA_900446055.1	Babortus_242	GCA_003253375.1
Bmelitensis_199	GCA_006506015.1	Babortus_043	GCA_900446025.1	Babortus_243	GCA_003194875.1
Bmelitensis_200	GCA_006506685.1	Babortus_044	GCA_000366645.1	Babortus_244	GCA_000480015.1

## Sheet: A1c
Table S1c A list of the tentative deleted 118 Brucella genomes used for SNP discovery species specific targets via CheckM software
Bin Id	Marker lineage	Completeness	Contamination	Strain heterogeneity
Binopinata_001	c__Alphaproteobacteria (UID3305)	100	0	16.67
Binopinata_002	c__Alphaproteobacteria (UID3305)	100	0	16.67
Bintermedia_001	c__Alphaproteobacteria (UID3305)	100	0.01	14.29
Bintermedia_002	c__Alphaproteobacteria (UID3305)	100	0.01	14.29
Bintermedia_003	c__Alphaproteobacteria (UID3305)	99.56	0.01	14.29
Bintermedia_004	c__Alphaproteobacteria (UID3305)	100	0	14.29
Bintermedia_005	c__Alphaproteobacteria (UID3305)	100	0.01	13.33
Bintermedia_006	c__Alphaproteobacteria (UID3305)	100	0.01	12.5
Bintermedia_007	c__Alphaproteobacteria (UID3305)	100	0.01	12.5
Bintermedia_008	c__Alphaproteobacteria (UID3305)	100	0	12.5
Bintermedia_009	c__Alphaproteobacteria (UID3305)	100	0.1	12.5
Bintermedia_010	c__Alphaproteobacteria (UID3305)	99.56	0	12.5
Bintermedia_011	c__Alphaproteobacteria (UID3305)	100	0.54	12.5
Bintermedia_012	c__Alphaproteobacteria (UID3305)	100	0	12.5
Bintermedia_013	c__Alphaproteobacteria (UID3305)	100	0.22	11.11
Bintermedia_014	c__Alphaproteobacteria (UID3305)	100	0.1	11.11
Bintermedia_015	c__Alphaproteobacteria (UID3305)	100	0.01	11.11
Bintermedia_016	c__Alphaproteobacteria (UID3305)	99.89	1.36	11.11
Bintermedia_017	c__Alphaproteobacteria (UID3305)	78.62	0	11.11
Bintermedia_018	c__Alphaproteobacteria (UID3305)	100	0	11.11
Bintermedia_019	c__Alphaproteobacteria (UID3305)	100	0	11.11
Bintermedia_020	c__Alphaproteobacteria (UID3305)	100	0	11.11
Bintermedia_021	c__Alphaproteobacteria (UID3305)	100	0.01	11.11
Bintermedia_022	c__Alphaproteobacteria (UID3305)	100	0.45	11.11
Bintermedia_023	c__Alphaproteobacteria (UID3305)	95.13	3.12	11.11
Bintermedia_024	c__Alphaproteobacteria (UID3305)	88.63	0.01	11.11
Bintermedia_025	c__Alphaproteobacteria (UID3305)	97.82	0	11.11
Bintermedia_026	c__Alphaproteobacteria (UID3305)	93.76	1.09	10
Bintermedia_027	c__Alphaproteobacteria (UID3305)	68.5	1.53	10
Bsuis_003	c__Alphaproteobacteria (UID3305)	99.78	0	0
Bsuis_004	c__Alphaproteobacteria (UID3305)	99.78	0	0
Bsuis_067	c__Alphaproteobacteria (UID3305)	99.13	0	0
Bsuis_080	c__Alphaproteobacteria (UID3305)	97.18	0.03	0
Bvulpis_001	c__Alphaproteobacteria (UID3305)	99.78	0	0
Bvulpis_002	c__Alphaproteobacteria (UID3305)	99.78	0	0
Bovis_001	f__Brucellaceae (UID3482)	99.49	0.45	0
Bovis_002	f__Brucellaceae (UID3482)	99.49	0.87	0
Bovis_003	f__Brucellaceae (UID3482)	99.08	0.45	0
Bovis_004	f__Brucellaceae (UID3482)	99.08	0.55	0
Bovis_005	f__Brucellaceae (UID3482)	99.08	0.45	0
Bovis_006	f__Brucellaceae (UID3482)	99.47	0.45	0
Bovis_007	f__Brucellaceae (UID3482)	99.49	0.45	0
Bovis_008	f__Brucellaceae (UID3482)	99.08	0.45	0
Bovis_009	f__Brucellaceae (UID3482)	99.08	0.45	0
Bovis_010	f__Brucellaceae (UID3482)	99.08	1.52	0
Bovis_011	f__Brucellaceae (UID3482)	99.49	0.45	0
Bovis_012	f__Brucellaceae (UID3482)	99.08	0.45	0
Bovis_013	f__Brucellaceae (UID3482)	99.08	0.62	0
Bovis_014	f__Brucellaceae (UID3482)	99.49	0.45	0
Bovis_015	f__Brucellaceae (UID3482)	99.08	0.45	0
Bovis_016	f__Brucellaceae (UID3482)	99.08	0.45	0
Bovis_017	f__Brucellaceae (UID3482)	99	0.45	0
Babortus_002	g__Brucella (UID3486)	99.44	1.21	100
Babortus_027	g__Brucella (UID3486)	95.22	0.98	96.11
Babortus_028	g__Brucella (UID3486)	97.91	0.98	95.59
Babortus_031	g__Brucella (UID3486)	97.98	0.98	94.74
Babortus_032	g__Brucella (UID3486)	99.26	0.77	92.47
Babortus_033	g__Brucella (UID3486)	97.47	1.43	92.45
Babortus_035	g__Brucella (UID3486)	99.25	0.98	92.17
Babortus_097	g__Brucella (UID3486)	99.5	2.1	91.15
Babortus_119	g__Brucella (UID3486)	99.5	0.72	90.82
Babortus_125	g__Brucella (UID3486)	99.5	0.93	88.89
Babortus_133	g__Brucella (UID3486)	99.5	4.76	88.16
Babortus_160	g__Brucella (UID3486)	99.5	1.31	87.5
Babortus_173	g__Brucella (UID3486)	99.5	0.92	83.58
Babortus_182	g__Brucella (UID3486)	99.5	2.1	81.63
Babortus_183	g__Brucella (UID3486)	99.5	3.87	80.77
Babortus_209	g__Brucella (UID3486)	99.24	1.26	79.49
Babortus_233	g__Brucella (UID3486)	87.7	18.47	76.56
Babortus_235	g__Brucella (UID3486)	93.69	16.41	70
Babortus_236	g__Brucella (UID3486)	97.43	0.97	66.67
Babortus_237	g__Brucella (UID3486)	95.23	11.39	61.9
Babortus_238	g__Brucella (UID3486)	99.12	1.07	61.9
Babortus_244	g__Brucella (UID3486)	99.5	8.76	57.14
Babortus_246	g__Brucella (UID3486)	98.19	2.52	40
Babortus_248	g__Brucella (UID3486)	96.87	1.29	37.5
Babortus_252	g__Brucella (UID3486)	98.94	10.35	33.33
Babortus_253	g__Brucella (UID3486)	99.24	7	33.33
Babortus_258	g__Brucella (UID3486)	98.45	1.54	28.57
Babortus_260	g__Brucella (UID3486)	98.21	0.6	25
Bcanis_020	g__Brucella (UID3486)	99.53	0.67	23.08
Bcanis_021	g__Brucella (UID3486)	99.49	0.7	22.22
Bcanis_029	g__Brucella (UID3486)	98.3	0.87	22.22
Bceti_005	g__Brucella (UID3486)	99	0.67	20
Bceti_007	g__Brucella (UID3486)	99.28	0.82	18.18
Bneotomae_005	g__Brucella (UID3486)	87.79	4.05	0
Bneotomae_006	g__Brucella (UID3486)	91.07	2.22	0
Bpinnipedialis_002	g__Brucella (UID3486)	99.5	0.82	0
Bsuis_040	g__Brucella (UID3486)	98.3	3.42	0
Bsuis_064	g__Brucella (UID3486)	99.35	0.54	0
Bsuis_066	g__Brucella (UID3486)	81.81	2.31	0
Bsuis_069	g__Brucella (UID3486)	98.27	0.89	0
Bsuis_071	g__Brucella (UID3486)	95.42	5.75	0
Bsuis_072	g__Brucella (UID3486)	96.8	8.7	0
Babortus_231	g__Brucella (UID3505)	97.12	1.28	78.57
Bmelitensis_094	g__Brucella (UID3505)	99.45	1.27	10
Bmelitensis_128	g__Brucella (UID3505)	96.8	3.34	10
Bmelitensis_151	g__Brucella (UID3505)	99.45	1.27	10
Bmelitensis_173	g__Brucella (UID3505)	93.34	2.98	10
Bmelitensis_198	g__Brucella (UID3505)	99.45	0.8	10
Bmelitensis_209	g__Brucella (UID3505)	99.32	0.85	10
Bmelitensis_222	g__Brucella (UID3505)	99.37	1.1	9.09
Bmelitensis_228	g__Brucella (UID3505)	99.45	0.81	9.09
Bmelitensis_243	g__Brucella (UID3505)	98.76	0.78	5.88
Bmelitensis_245	g__Brucella (UID3505)	99.11	1.72	0
Bmelitensis_246	g__Brucella (UID3505)	99.11	1.37	0
Bmelitensis_259	g__Brucella (UID3505)	99.07	1.22	0
Bmelitensis_263	g__Brucella (UID3505)	99.11	1.3	0
Bmelitensis_268	g__Brucella (UID3505)	99.45	0.82	0
Bmelitensis_273	g__Brucella (UID3505)	99.45	1.06	0
Bmelitensis_275	g__Brucella (UID3505)	99.45	0.91	0
Bmelitensis_294	g__Brucella (UID3505)	99.45	0.84	0
Bmelitensis_319	g__Brucella (UID3505)	99.45	0.82	0
Bmelitensis_325	g__Brucella (UID3505)	98.64	5.76	0
Bmelitensis_326	g__Brucella (UID3505)	92.32	1.15	0
Bmelitensis_327	g__Brucella (UID3505)	98.32	0.79	0
Babortus_049	k__Bacteria (UID203)	98.28	8.62	92.05
Babortus_234	k__Bacteria (UID203)	74.14	1.72	75.68

## Sheet: A1d
Table S1d A breakdown ofgenetic near-neighbors of Brucella genus genomes used for specific fragments discovery of loci
Ochrobactrum_tritici
Ochrobactrum_thiophenivorans
Ochrobactrum_sp
Ochrobactrum_soli
Ochrobactrum_quorumnocens
Ochrobactrum_pseudintermedium
Ochrobactrum_pituitosum
Ochrobactrum_pecoris
Ochrobactrum_oryzae
Ochrobactrum_lupini
Ochrobactrum_intermedium
Ochrobactrum_haematophilum
Ochrobactrum_grignonense
Ochrobactrum_daejeonense
Ochrobactrum_cytisi
Ochrobactrum_ciceri
Ochrobactrum_anthropi
Brucella_tritici
Brucella_pseudogrignonensis
Brucella_pseudintermedia
Brucella_pituitosa
Brucella_oryzae
Brucella_intermedia
Brucella_ciceri
Brucella_anthropi

## Sheet: A1e
Table S1e A list of the deleted 11 Brucella genomes used for SNP discovery of species specific targets after whole-genome cluster
Rename	Assembly ID
Bmelitensis_138	GCA_009823695.1
Bmelitensis_307	GCA_000250835.2
Bmelitensis_309	GCA_000250775.2
Babortus_204	GCA_016091965.1
Babortus_223	GCA_000292045.1
Babortus_230	GCA_000292205.2
Babortus_231	GCA_000292145.2
Babortus_250	GCA_016091955.1
Bsuis_065	GCA_000292125.1
Bsuis_080	GCA_000661995.2
Binopinata_003	GCA_000662015.2

## Sheet: A1f
Table S1f New added Brucella and non-Brucella Brucellaceae used for evaluation of the GAMOSCE test from website
species	numbers
Brucella abortus_add	223
Brucella melitensis_add	94
Brucella suis_add	11
Brucella anthropi_add	9
Brucella ciceri_add	1
Brucella intermedia_add	6
Brucella oryzae_add	1
Brucella pituitosa_add	2
Brucella pseudintermedia_add	1
Brucella pseudogrignonensis_add	4
Brucella tritici_add	1
Ochrobactrum_anthropi_add	54
Ochrobactrum_ciceri_add	1
Ochrobactrum_cytisi_add	2
Ochrobactrum_daejeonense_add	2
Ochrobactrum_endophyticum_add	1
Ochrobactrum_gallinifaecis_add	1
Ochrobactrum_grignonense_add	2
Ochrobactrum_haematophilum_add	4
Ochrobactrum_intermedium_add	5
Ochrobactrum_lupini_add	2
Ochrobactrum_oryzae_add	2
Ochrobactrum_pecoris_add	3
Ochrobactrum_pituitosum_add	5
Ochrobactrum_pseudintermedium_add	2
Ochrobactrum_pseudogrignonense_add	8
Ochrobactrum_quorumnocens_add	1
Ochrobactrum_rhizosphaerae_add	2
Ochrobactrum_soli_add	1
Ochrobactrum_sp_add	5
Ochrobactrum_thiophenivorans_add	2
Ochrobactrum_tritici_add	6
Total	464

## Sheet: A1g
Table S1g A list of species from other family used to determine the specificity of GAMOSCE test
species	numbers
Acinetobacter_baumannii	5637
Bacillus_anthracis	332
Bacillus_cereus	1118
Bacillus_thuringiensis	622
Bacillus_pseudomycoides	111
Bacillus_amyloliquefaciens	99
Bacillus_mycoides	78
Bacillus_wiedmannii	166
Bacillus_licheniformis	186
Bacillus_megaterium	139
Bacillus_pumilus	156
Bacillus_subtilis	396
Bacillus_toyonensis	223
Bacillus_velezensis	130
Yersinia_pestis	539
Yersinia_enterocolitica	192
Yersinia_pseudotuberculosis	79
Yersinia_ruckeri	68
Total	10271

## Sheet: A2a
Table S2a The specific fragments for Brucella genus
AGenus-BCSP31	CGCTTGCCTTTCA[GA]GTC[TC]GCG[CA]CC[GA]ATTTGATGTTTGC[GA]TCCTTACGCGCAACGAT[GA]TGGATC[GA]TTTCCGGGTAAAGCGT[TC]GCCAG[CA]AGGCGCAAATCTTCCACCTTGCCCTTGCCATCATAAAGGCCGGTGCCGTTATAGGCCCAATAGGCAACG[TC]C[TC]GACTG[TC]GT[GA]AA[GA]CC[GA]GACTC[TC]AGAGCGCCCGACTTGATCGCATTGATATTGGCAACCGA[GA]CCA
AGenus-cobQ	CGT{0,1}GCGG[GA]TC[GA]G[TG]GACC[TC][TG]{0,1}GCGG[CG][TG]ATTGAAGG[TC]A[GA]TGTG[TC]GC[GA]ATATCGAGGG[GA][TC]TG[TG]G[TC]CTTCTC[TG]ATATCGAGACG[CA]TGA[TC]GGAGCCGG[GA]AAAAGT[TG]GTTCGCAATGTTGAGGCGGTGTCGCTGCTGC{0,1}ATGATG[GA][GA]CCGCTG[CG]AGGGCG{0,1}TATGAAATCCACATCGGGC[GA]CACCAG[TC]GGGC{0,1}CGGATATGGCGCGGCCATTTGCGCG[TC]AT[TC]GG[TC]GAT[TC]ATGATGATGGGGCCGT[TC]TCGCCCGATGG[TC]CG[TC]ATCATGGGAACCTATCT[TC]CA[TC]…
AGenus-ddlA	CTTTGGGTTTGCCCATATTTATCAAACC[CA]GC[TC]{0,1}CGTCAG{0,1}G{0,1}G[TC][TG]C[GA]TCTGTCGGTGT[TC]CACAAG[GA]TTG[TC]A[GA]CGGAAGCAGATTATCAGGC[TC]GCCATGTC[TC]GATGGTTTCA[TC]TTATGACGATAAGCTGCTGGC[TC]GAAGA[GA]TTCATTCAGG[TC]GCGCGAAGTTGAATG[TC]GGCGTTCTTGAAGACGAAGGAGG[TC]G[TC]GCTGTTCGT[CG]TCGCGCGCTGGCGAGAT[TC][CG]TGCC[TCA]GCGGAAAGCCA[TC]TGTTTTTATAGTTATGATGC[TC]AAATATAT[TC]GATGCCGATGG[GA]ACTGAGATCAAGGT{0,1}[TC]CC[T…
AGenus-fumC	AGTC[TG]TC[TC]AA[TC]GA[TC]A[CG][TC]TTCCCGAC[GA]GC[GA]ATCCA[TC]AT[TC]GCCA[TC][CGA]GC[TG]GT[TC]GAA[GA]CCGT[TC]AACCG[CG]CTCTA[TG]CC[CA]G[TC]GCT[TCA]GA[GA]CA[TC]CT[CG]A[TC]CAA[GA]GC[CA][CG]T[CG]AA[GA]G[TC]CAA[GA]GAAGAAGCATTCA[GA]GGACATCAT[TC]AAGATTGGCCGCACCCA[TC]AC[GA]CAGGA[TC]GC[GA]AC[GA]CC[TG]GT[CG]AC[GA]CT[CG]GG[GA]CA[GA]GA[GA]TTTTC[CG]GG[TC]TA[TC]CG[TC]GC[GA]GC[GA]CTTGAATATGC[CG]CGCCATCG[CG][CA]T…
AGenus-glk	AAACCGGAGG[GA]G{0,1}GGCTGT[TC]GCCACCCG[TC]GTCGTGC(TCG){0,1}T[CG]GGC[CA]C[CG]{0,1}[GA]GCAC[CG][GA]GCCTT(GG){0,1}GG[TC]GTGGCAGG[TC]CTG[TG]TT[TC]GCACAC{0,1}C[GA]TCA[TC]GCATGGGTTCC[CG][GA]TTCC[TC]GGTGAAGGCGGTCATAT[TC]GA[TC]ATCGGTCCAC[GA]CACC[GA]AAC[GA]CGA[TC]TA[TCG]CAGATTTT[TC]CCGCATATCGAACG[TC]ATCGAAGGGCG[TC]GT[TC][GA]C[TC][GA]GCGA[GA]CAAATTCT[TC]AGCGGGCG[GA]G[GA]CCG{0,1}TGC[TG]CAA[TC]CTCTAT[CG]TGGG…
AGenus-mutL	TGTGCA[TC]GATATTCG[TA]GCGCT[TC]GG[TG]TTTCG[TC]GGCGAGGCCCTGCCCTCCATCGGCTCGGTGTC[GA]AAGCTGACGCTCAAGTCCC[GA][CG][TC]CGCAGGATGCCGATAGCGGCTTTGAAGTGTGCGTTACCGGCGGGCATCT[TC]GATGGACC[CG]CGCCCGACGGCGCTCAATCGCGGCACGATCGTGGAA[GA]TGCGCGA[TC]CTCTTTTACGCCACGCCCGCGCGCCTGAAATTCATGAAGACGGATCGGGC[TGA]GA[GA]GCCACGGCCATAACCGACGT[CG]G[TC][TCA]AAGCGCATT[GA]GCATCGCCTTTCC[GA]CATATCCGT{4,5}CC[CA]TCGCCGGAACCGAC{2,3}GCACCC…
AGenus-putA	GCGTGGCCTTTCCGGCACCGGCCCGAA(GGCG){0,1}GGCGGG[TC]GG[TC]CCGCT[TC]TATC[TC]TGGCCGTCTGG[TG][TC]GAA[NGA]{0,1}CC[CG]C[GA]CCGA[TG]CCCGCCGCGTCACGCTTCG[GA]TTCA[TC][CA]CCGATGCGG[TC]GCTGAAGG[GA]CT[TG]TGC[TC]CG[CG][TG]GGC[TC]CGGCAATCGCGG[TC][GA]TGAA[TC]GATCTGGCGCAGGC[CGA]GCGCGCGATACCGGC[TA]GT[GA]CTTCGGCGCTCGGTCTCGAACG{0,1}T{0,1}[CA]{0,1}[GA]{0,1}(AAC){0,1}TGCCGGGCCCGGTTGGCGAGCGC[GA]ATCT[TC]TA[TC]GCTC{0,1}CTCC…
AGenus-trpE	AC[GA]GGGCTGACGCT[GA]CGCACCATCCG[TC]AT[CA]AAGGATGG[TC]GTGGCGGAAATCCGTGC[GA]GGGGCGAC[GA]CT[TG]CTGTTCGATTCCAA[TC]CCTGACGAGGAAGAAG[CA][CA]GAGACCGAA[TC]T[GA]AAGGCATCGGCCATGATTGCGGCTGTGCG[TG]GACGCACA[GA]AAGAGCAATCAGATCGCGGA[GA][GA]A[CA][CA][CGA][TC]GT[GA]GC[GA]GCAAAGGTGGG[TC]GAGGG[GA]{0,1}G[TG]TTCGATCCTGCTGGTCGATCA[TC]GAGGATTC[TC]TTCGTCCA[TC]ACGCTTGCCAATTATTTCC[GA]CCAGACGGG[TC]GCCA[GA]GGTTTCCAC[CG]GTG…

## Sheet: A2b
Table S2b The specific fragments for B. melitensis
Probes Name	Probes abbreviation	ChromsomeI (AE008917)		ChromsomeII (AE008918)		SNP Position In This Fragment	Sequence	Sequence (with SNP)
		Start	End	Start	End
Bmelitensis_Probe01	BMP01	295848	296168	-	-	100; 242	GCTCCTGATTGCGGGAGAACTGGGCAAGGCGAAGCTTGCCGCGGATTTCCGCTTCGCGGCCTGCGGCTTTATTGTGCAGCACTTCGGTTGCCACACGCCTGGCAATGGCGGCTTCGGCTTCCTTTTCCTGGCGCAGAATGCCGTGATTGGCGATGACATGGCCCATTTCATGGGCAATAACGGCCGCAACTTCCGAGGAATCATTGGCAAGCGCGAGCAGGCCGCGCGTTATATAGAGATAACCGCCGGGGAGGGCGAAGGCATTGATGTTGGGTGAATCCAGAATGGTGATGCGATAGGTCTGGTCCGGCTTGTCGGAA	GCTCCTGATTGCGGGAGAACTGGGCAAGGCGAAGCTTGCCGCGGATTTCCGCTTCGCGGCCTGCGGCTTTATTGTGCAGCACTTCGGTTGCCACACGCC[TC]GGCAATGGCGGCTTCGGCTTCCTTTTCCTGGCGCAGAATGCCGTGATTGGCGATGACATGGCCCATTTCATGGGCAATAACGGCCGCAACTTCCGAGGAATCATTGGCAAGCGCGAGCAGGCCGCGCGTTATATAGAGATA[AG]CCGCCGGGGAGGGCGAAGGCATTGATGTTGGGTGAATCCAGAATGGTGATGCGATAGGTCTGGTCCGGCTTGTCGGAA
Bmelitensis_Probe02	BMP02	445018	445211	-	-	100	CCGAGCCTGCCGCACCAAAGGCGATGCGGGCGAACTGAAGCCGGGCGGAGGCGTTGCGCGCGCTCGATTTGATGAGCGCCATCGCGTCTTCATCGGCGCTACCTTCTTCCAGCAATTCCAGACCATTATTGATCGCACCGACCGGTGAGATGATGTCGTGGCAGATCCTGCTGCACAAAAGTGCACCAAGATC	CCGAGCCTGCCGCACCAAAGGCGATGCGGGCGAACTGAAGCCGGGCGGAGGCGTTGCGCGCGCTCGATTTGATGAGCGCCATCGCGTCTTCATCGGCGC[TC]ACCTTCTTCCAGCAATTCCAGACCATTATTGATCGCACCGACCGGTGAGATGATGTCGTGGCAGATCCTGCTGCACAAAAGTGCACCAAGATC
Bmelitensis_Probe03	BMP03	511480	511635	-	-	5; 146	AAAAAAGTGCCTTGCTGGCAAGAATCGAAGCTCTGGAAGCACGTCTTGCCAAATTTGAGGGTGGTTCCAGCGCCAAACCGGCAAAATCGGCATCCGTTTCGTCAAAATCCAAAGATAATTCCTGATTATTTATTAACAGGCCGCAGGTGGCAAAA	AAAA[AC]AGTGCCTTGCTGGCAAGAATCGAAGCTCTGGAAGCACGTCTTGCCAAATTTGAGGGTGGTTCCAGCGCCAAACCGGCAAAATCGGCATCCGTTTCGTCAAAATCCAAAGATAATTCCTGATTATTTATTAACAGGCCGCA[GA]GTGGCAAAA
Bmelitensis_Probe04	BMP04	536026	536233	-	-	26; 108	GGGTAGCTGACCCAATAGGGGGCGGCAATGATGACTTCGTCGCCGGGGTTCAGCGTGGCCATGAAGGCGTTGAACAAAATCTGCTTGCCGCCGGTGCCGACGATGGTTTGTTCCGGCTTGTAGTCGAGGCCGTTTTCACGCTTGAACTTGGAGACGATGGCCTGGCGCAGTTGCGGGATGCCGGATACGGGCGTGTACTTTGTTTCA	GGGTAGCTGACCCAATAGGGGGCGG[CG]AATGATGACTTCGTCGCCGGGGTTCAGCGTGGCCATGAAGGCGTTGAACAAAATCTGCTTGCCGCCGGTGCCGACGATGGT[TC]TGTTCCGGCTTGTAGTCGAGGCCGTTTTCACGCTTGAACTTGGAGACGATGGCCTGGCGCAGTTGCGGGATGCCGGATACGGGCGTGTACTTTGTTTCA
Bmelitensis_Probe05	BMP05	613041	613246	-	-	32; 106	TTTTCGCCAATGGGGCTTTCCGGTCAATCCGTTGATGAAGCGGTTCAACAGCGTGGATGGGTTGCTTGCGCATTATCGCGCCATCGGCATGGAGCGTCCCACGCTGGATTACGATATCGACGGTGTTGTTTACAAGGTGGACCGGCTCGACCTGCAAACCCGGCTTGGTTTTCGCTCGCGCAGCCCGCGCTGGGCGATTGCGCAT	TTTTCGCCAATGGGGCTTTCCGGTCAATCCG[TC]TGATGAAGCGGTTCAACAGCGTGGATGGGTTGCTTGCGCATTATCGCGCCATCGGCATGGAGCGTCCCACGCT[GC]GATTACGATATCGACGGTGTTGTTTACAAGGTGGACCGGCTCGACCTGCAAACCCGGCTTGGTTTTCGCTCGCGCAGCCCGCGCTGGGCGATTGCGCAT
Bmelitensis_Probe06	BMP06	628796	628940	-	-	93	CAACAGCGATAAGAATGCACTGCTTTCCACCGACCTTAAATGGAGCGGCGCCAAACTCAACGATTTCTACCGATTGGAAGATGGTTCGGCTCTTTTGGGGGGCGTCGTCAAGGCTTCCCTTAATCTCAATGGCAGTGGCGACAG	CAACAGCGATAAGAATGCACTGCTTTCCACCGACCTTAAATGGAGCGGCGCCAAACTCAACGATTTCTACCGATTGGAAGATGGTTCGGCTC[TC]TTTGGGGGGCGTCGTCAAGGCTTCCCTTAATCTCAATGGCAGTGGCGACAG
Bmelitensis_Probe07	BMP07	890112	890278	-	-	67	AACGAGGATGACGTTCTCATGCTTCTCCGGCACAGCGCGCCGATAAAGCGCATGATCGTCGGGATGAATGACGACGGCGATTGTGCCGATGAGCGGGCAATCGGTAAAAGCGCGCAAAGTGCGGGCAAGCACGGCCTCTGCGCCAATGAGCCGATATTGCTTCGGC	AACGAGGATGACGTTCTCATGCTTCTCCGGCACAGCGCGCCGATAAAGCGCATGATCGTCGGGATG[AG]ATGACGACGGCGATTGTGCCGATGAGCGGGCAATCGGTAAAAGCGCGCAAAGTGCGGGCAAGCACGGCCTCTGCGCCAATGAGCCGATATTGCTTCGGC
Bmelitensis_Probe08	BMP08	1029666	1029844	-	-	79	GCTTCGTCGCGCACGGAATACCAGCCGGCATAGCCGCCCTTGTAAATATCCCCATTTGCGACCATCGCCTGCCAAATGACCTGGCTGGCCTTGTAATGACGCTCTTCGGAGGTGCGGATATAGTCGTCGTTGGAGCTGTTCAGCACTTCAGCCATTCGACGGAAGGCGGATGTGTTGC	GCTTCGTCGCGCACGGAATACCAGCCGGCATAGCCGCCCTTGTAAATATCCCCATTTGCGACCATCGCCTGCCAAATG[AG]CCTGGCTGGCCTTGTAATGACGCTCTTCGGAGGTGCGGATATAGTCGTCGTTGGAGCTGTTCAGCACTTCAGCCATTCGACGGAAGGCGGATGTGTTGC
Bmelitensis_Probe09	BMP09	1080819	1080973	-	-	55	GGCAATCGCCGCGCTTGGTGACGAAATTATAGATACCGCCCTTGCCGTCCTTGTTGCCGGGGAACCAGTTCTGGACCGTCGAATATTTGATTTCGGCGTTTTCCATCGCAACCAGCTCGACAACCGCCGCGTGAAGCTGGTTCTCGTCGCGTTG	GGCAATCGCCGCGCTTGGTGACGAAATTATAGATACCGCCCTTGCCGTCCTTGT[TC]GCCGGGGAACCAGTTCTGGACCGTCGAATATTTGATTTCGGCGTTTTCCATCGCAACCAGCTCGACAACCGCCGCGTGAAGCTGGTTCTCGTCGCGTTG
Bmelitensis_Probe10	BMP10	1230768	1231083	-	-	135; 136	AGCGCCTGAAGCCGAACAAGAGATACCGGGCTTCAACGGTATATTTATTGGGGAACTTACGCCTTGGAATCAATCAATTGGCGCGATTCCCTGCATTTCAGCATTCTCAATGCCGCTTGACCAACATGCGAAACAATTTCACAAACGTCAAGCTGTTCTTTGCTGCCCGCAAAGAAAGAAGGGCCGCGATTTCTCGCAGCCCTTGCAACCTGTTATGATGCCCGCAGATCAGCTCTTATGCCGCGGTTTGGCCCCGCGGCTTTCGCCGCGAATGACCAAGGCAAGCCGATCCAGCACGGCATTGACCAGCTTCGG	AGCGCCTGAAGCCGAACAAGAGATACCGGGCTTCAACGGTATATTTATTGGGGAACTTACGCCTTGGAATCAATCAATTGGCGCGATTCCCTGCATTTCAGCATTCTCAATGCCGCTTGACCAACATGCGAAAC[AG][AG]TTTCACAAACGTCAAGCTGTTCTTTGCTGCCCGCAAAGAAAGAAGGGCCGCGATTTCTCGCAGCCCTTGCAACCTGTTATGATGCCCGCAGATCAGCTCTTATGCCGCGGTTTGGCCCCGCGGCTTTCGCCGCGAATGACCAAGGCAAGCCGATCCAGCACGGCATTGACCAGCTTCGG
Bmelitensis_Probe11	BMP11	1343766	1343965	-	-	100	GTGTGGATCAGGCCAAGCGCACGATAGCAATCCTGCACCGTATCGACCATGACGCGGAAGCCGAAAATGTCGGAAAGCTGCTCGAAGGAAAGGCCCTTGCTCTCCATCTTGCGGAAAACCGACCATGGCTTCTTCTGGCGGCTTTTCACGCTGGCCTTGATGCCGTTCTTCTCGAAAATTTCAGAGAGATCCGTTTCGA	GTGTGGATCAGGCCAAGCGCACGATAGCAATCCTGCACCGTATCGACCATGACGCGGAAGCCGAAAATGTCGGAAAGCTGCTCGAAGGAAAGGCCCTTG[CG]TCTCCATCTTGCGGAAAACCGACCATGGCTTCTTCTGGCGGCTTTTCACGCTGGCCTTGATGCCGTTCTTCTCGAAAATTTCAGAGAGATCCGTTTCGA
Bmelitensis_Probe12	BMP12	1510800	1510999	-	-		ATGCCGGAGGCAATAAGGACGCCCCACGGAAAACGGCGTGATGTTTGCTCCAGCGTCATTTGTTGCTGTCCAGACGCCCCTGCTCGGCCTTGTGGCGATGTTGCATATTGATGAGAATGCCCTTGATCCACCGCATGGCGACGAGGCTCAATATAATTGCAAGCGGCACCCATAAAATGAAATGTACCCAGAGCGGCGG	ATGCCGGAGGCAATAAGGACGCCCCACGGAAAACGGCGTGATGTTTGCTCCAGCGTCATTTGTTGCTGTCCAGACGCCCCTGCTCGGCCTTGTGGCGAT[GA]TTGCATATTGATGAGAATGCCCTTGATCCACCGCATGGCGACGAGGCTCAATATAATTGCAAGCGGCACCCATAAAATGAAATGTACCCAGAGCGGCGG
Bmelitensis_Probe13	BMP13	1519114	1519326	-	-	92; 113	GGGGGTAACCGTGGTGGATGACGGCACGATTGCCGAGCGCCGCGGATCGCTGACCATCGACGATGAAGGTACGCCGACCAACCGCACCGTGTTGATCGAGGACGGCAAACTCTTCAACTACATGCAGGACCGGCAGAATGCACGGTTGATGGGCATGGAAGCAACCGGCAATGGACGCCGCGAATCCTATGCACACGCGCCCATGCCGCGCA	GGGGGTAACCGTGGTGGATGACGGCACGATTGCCGAGCGCCGCGGATCGCTGACCATCGACGATGAAGGTACGCCGACCAACCGCACCGTG[TC]TGATCGAGGACGGCAAACTC[TG]TCAACTACATGCAGGACCGGCAGAATGCACGGTTGATGGGCATGGAAGCAACCGGCAATGGACGCCGCGAATCCTATGCACACGCGCCCATGCCGCGCA
Bmelitensis_Probe14	BMP14	1646491	1646652	-	-	31; 105; 109	ACCGGGTCAAGGATGCGGATGTGAACTGGCGCATGGCTTTCGTCTGGCGCAAGGGCGCGTTTCTCTCCCATGCCGCACGCGCCTGGCTTGCGCTGTGCGAAGGCACATTCACCCCTGCAAAAGCTTGAAAACCGGGCATAAATGCCTACCTTTTCTGGCAG	ACCGGGTCAAGGATGCGGATGTGAACTGGC[GA]CATGGCTTTCGTCTGGCGCAAGGGCGCGTTTCTCTCCCATGCCGCACGCGCCTGGCTTGCGCTGTGCGAAGGC[AG]CAT[TC]CACCCCTGCAAAAGCTTGAAAACCGGGCATAAATGCCTACCTTTTCTGGCAG
Bmelitensis_Probe15	BMP15	1665894	1666044	-	-	100	CGGGATCGAAGTTACGGTCGAGCCCTTTTATCTGGAAGTCCAATCCGAGCCGGAAGAAAACCGTTATGTATGGGGTTATCGCGTCACGATCGTGAACAATTCATCCGAAACGGTGCAGCTTTGCTCGCGCTACTGGCAGATCACCGACGC	CGGGATCGAAGTTACGGTCGAGCCCTTTTATCTGGAAGTCCAATCCGAGCCGGAAGAAAACCGTTATGTATGGGGTTATCGCGTCACGATCGTGAACAA[TC]TCATCCGAAACGGTGCAGCTTTGCTCGCGCTACTGGCAGATCACCGACGC
Bmelitensis_Probe16	BMP16	1681633	1681832	-	-		GATGAAAGACAGCAGGTCGTCTTCACCATCATCAACCAGCGTTGCGAATATGTGGGCGAGATGGCTCCCGTCATCGACCGGCTGAAGGAAATGCGCAGTAATGTGCTGGCGCTTTTCATCGGCCTTTTGAAAGTGGCCGAGCGGCGCGGCGAGCTTGCAAGCGAATGGAGCGCCGAAACGGCGGCGCAAATTCTGCTCG	GATGAAAGACAGCAGGTCGTCTTCACCATCATCAACCAGCGTTGCGAATATGTGGGCGAGATGGCTCCCGTCATCGACCGGCTGAAGGAAATGCGCAGT[AG]ATGTGCTGGCGCTTTTCATCGGCCTTTTGAAAGTGGCCGAGCGGCGCGGCGAGCTTGCAAGCGAATGGAGCGCCGAAACGGCGGCGCAAATTCTGCTCG
Bmelitensis_Probe17	BMP17	1695127	1695326	-	-		CGATTTCGTCCTGCCGGATTCCGAGGGCAATCTTCTGGATGCGCTTCAGGAATGGTTTCAGAAGGCGGGCAAGGCGCGCACCGATTATTCGTTCCACATAGCGATCACCGGCTGGAACGAGCGCACTTTCAACGAAATGGTCGAAGTGGTGAAGCGCGGCATCAACACGTTCAAGCATTTCATGGCCTATAAGGGCGCG	CGATTTCGTCCTGCCGGATTCCGAGGGCAATCTTCTGGATGCGCTTCAGGAATGGTTTCAGAAGGCGGGCAAGGCGCGCACCGATTATTCGTTCCACAT[AG]GCGATCACCGGCTGGAACGAGCGCACTTTCAACGAAATGGTCGAAGTGGTGAAGCGCGGCATCAACACGTTCAAGCATTTCATGGCCTATAAGGGCGCG
Bmelitensis_Probe18	BMP18	1945168	1945448	-	-	100; 250	AAGCTCGGTATCAAGGCCGCGGCCACGCACGAAAATCTGGTTTGGCGCACTGACCACCACATCAAGACGCGGAACAGTCGGTCGTGCGACCGGCGTCGGGACCTTGTTCTTGCGGGTTTCGACCCTGGCACGGTCCAGCGTCACCTGCACGTTCTTCGGTGTGTTTTTATGATGCACCGGCACATAGGCTGCACCGCCGCCGAGATTTTCCGGCACGGTGATTTCAGCCTTGTCAACATCGATACGGCCAGAAATCAATGGATCACGCATCAGCGGGCCG	AAGCTCGGTATCAAGGCCGCGGCCACGCACGAAAATCTGGTTTGGCGCACTGACCACCACATCAAGACGCGGAACAGTCGGTCGTGCGACCGGCGTCGG[GC]ACCTTGTTCTTGCGGGTTTCGACCCTGGCACGGTCCAGCGTCACCTGCACGTTCTTCGGTGTGTTTTTATGATGCACCGGCACATAGGCTGCACCGCCGCCGAGATTTTCCGGCACGGTGATTTCAGCCTTGTCAACATCGATACGGCC[AG]GAAATCAATGGATCACGCATCAGCGGGCCG
Bmelitensis_Probe19	BMP19	2066573	2066772	-	-	60	GTTTGCATTGAAAAATTCCATCGCCTGCAAAAGCCGCCGTCCATCGCCACCCAGAAAGACATGACGAAACAGCCTGAGCGGCGCGATGGTAAATCGAAACAAACCAACGATCCTGTGCAGTTCAGGCACCACATCTGCCGGTGCCGCCGCACGATAGGCAGCGAGCGCGCGATGCGGTGTCTTTGAAAATCGCGCCTGC	GTTTGCATTGAAAAATTCCATCGCCTGCAAAAGCCGCCGTCCATCGCCACCCAGAAAGA[TG]ATGACGAAACAGCCTGAGCGGCGCGATGGTAAATCGAAACAAACCAACGATCCTGTGCAGTTCAGGCACCACATCTGCCGGTGCCGCCGCACGATAGGCAGCGAGCGCGCGATGCGGTGTCTTTGAAAATCGCGCCTGC
Bmelitensis_Probe20	BMP20	-	-	146135	146295	92	CTTCAGGATTGGAACCGACCGCATAAATATGCCGGCCGAAAACAGTCTGGCGGGAAATAACGGTGAAGACGCCAAGAATAACCAGCAGCACAAGAACCGGAACCGGTACGCCCTGATAGCTGTTGAGGACCAGGATAAAACCAAGGATCAGGATACCCGT	CTTCAGGATTGGAACCGACCGCATAAATATGCCGGCCGAAAACAGTCTGGCGGGAAATAACGGTGAAGACGCCAAGAATAACCAGCAGCAC[AG]AGAACCGGAACCGGTACGCCCTGATAGCTGTTGAGGACCAGGATAAAACCAAGGATCAGGATACCCGT
Bmelitensis_Probe21	BMP21	-	-	148405	148590	86	GGCTTTAAGTTCTTTGCCTTCCCAGAAAATTTCACCAGTCCATGTGCCATGGGGATAAACACCCGACAGCACTTTCATCAGGGTGTACTTGCCCGCCCCGTTTTCACCGCACAGCCCGACACATTCTCCCGCGCGCACTTTCAGGTAAATGCCATCCAGCGCCTTGACGCCGTTGAACTCTTTAC	GGCTTTAAGTTCTTTGCCTTCCCAGAAAATTTCACCAGTCCATGTGCCATGGGGATAAACACCCGACAGCACTTTCATCAGGGTG[TG]ACTTGCCCGCCCCGTTTTCACCGCACAGCCCGACACATTCTCCCGCGCGCACTTTCAGGTAAATGCCATCCAGCGCCTTGACGCCGTTGAACTCTTTAC
Bmelitensis_Probe22	BMP22	-	-	156691	156890	100	CGCTGGTGAGCGAGCCTGTGGTGCCTCCATTGCCGATTTTCAGCAAGCCTTTATTGATGTTGGTAGGGCCGGTGAAGGTATTGTTGCCCGTTAGAACCCCGGTGCCGTCGTCATTTTTGGCAAGGGTCGTCTTGCCGGTACCGGCATCGCCGATCGAACCTGCAAGCGTGTTGTCGCCAGTATTCTTGCCGCCAAGTGC	CGCTGGTGAGCGAGCCTGTGGTGCCTCCATTGCCGATTTTCAGCAAGCCTTTATTGATGTTGGTAGGGCCGGTGAAGGTATTGTTGCCCGTTAGAACCC[CA]GGTGCCGTCGTCATTTTTGGCAAGGGTCGTCTTGCCGGTACCGGCATCGCCGATCGAACCTGCAAGCGTGTTGTCGCCAGTATTCTTGCCGCCAAGTGC
Bmelitensis_Probe23	BMP23	-	-	293960	294159		GCAACCACGGCAAGGCTGGAGGCGGAACGGCCTCATCGGGAGAATGACAATGACGCAAGAAAATAAGATGGGGAAGCATGAAAACAAGGCAGGAGGAGCTAGCTTGCTTCATTATGGCAATTTCATCGCGGGCCAGTGGCAGGATGCCGTTGGCGGCGAGCATATCACACTCAAGAATCCTTCCGATGGCAGTGATCTG	GCAACCACGGCAAGGCTGGAGGCGGAACGGCCTCATCGGGAGAATGACAATGACGCAAGAAAATAAGATGGGGAAGCATGAAAACAAGGCAGGAGGAGC[TG]AGCTTGCTTCATTATGGCAATTTCATCGCGGGCCAGTGGCAGGATGCCGTTGGCGGCGAGCATATCACACTCAAGAATCCTTCCGATGGCAGTGATCTG
Bmelitensis_Probe24	BMP24	-	-	294265	294464		GCATCCTGCACCGCATTTCGGAAGAAGTGCTGAAGAATATCGATCTGCTGACGGATCTGGAATCGAAGGATGTTGGCAAGCCCGTTACACAGGCGCGTGTCGATGTGGTGGCGCTGGCGCGTTATCTCGAATTCTACGGTGCTTCCGCCGACAAGGTGCATGGCGATACGCTGCCTTATCAGAACGGTTTCACGGTTCT	GCATCCTGCACCGCATTTCGGAAGAAGTGCTGAAGAATATCGATCTGCTGACGGATCTGGAATCGAAGGATGTTGGCAAGCCCGTTACACAGGCGCGTG[TC]CGATGTGGTGGCGCTGGCGCGTTATCTCGAATTCTACGGTGCTTCCGCCGACAAGGTGCATGGCGATACGCTGCCTTATCAGAACGGTTTCACGGTTCT
Bmelitensis_Probe25	BMP25	-	-	310279	310478		TTATATTGAACCGGATCGTCATCACCTCCGCTCCGCAATCCACCCCGTTCAAGGTTGTGACCGATCCCAAGGCTCCGCGCCAGCCGGTGCCTGCAAGTGGCGGGGCGGATTATCTCAAGACCATTCCTGGGTTTTCGACCATCCGCAATGGCGGAACCAATGGCGATCTGGTCTTTCGCGGCATGTTTGGCTCGCGCGT	TTATATTGAACCGGATCGTCATCACCTCCGCTCCGCAATCCACCCCGTTCAAGGTTGTGACCGATCCCAAGGCTCCGCGCCAGCCGGTGCCTGCAAGTG[GA]CGGGGCGGATTATCTCAAGACCATTCCTGGGTTTTCGACCATCCGCAATGGCGGAACCAATGGCGATCTGGTCTTTCGCGGCATGTTTGGCTCGCGCGT
Bmelitensis_Probe26	BMP26	-	-	392667	392817		AATCGACTTGTCGATTTCATTGATGTCGCGTTTGCCGCAGAGGGCCATGGTGATGTCCATTTCCTTGCGGATGATTTCCAGTGCAAGCGTCACGCCTTCGTTGCCCATGGCGCCAAGGCCATAAAGGAACGGACGGCCGATATAAACGCC	AATCGACTTGTCGATTTCATTGATGTCGCGTTTGCCGCAGAGGGCCATGGTGATGTCCATTTCCTTGCGGATGATTTCCAGTGCAAGCGTCACGCCTTC[GC]TTGCCCATGGCGCCAAGGCCATAAAGGAACGGACGGCCGATATAAACGCC
Bmelitensis_Probe27	BMP27	-	-	409991	410144	54	CAGCATCGCAACCCTGCCGACATTCGGCACACGCTGGCTGATGCCGCGCATTCTTGATTTCGTAGAAAAACATCCCGGCATTGCGCTCAATGTCGCTTCCCGTTCCGGTGTCTTCGATTTCGAGGAGCAACCCTTCGATCTGGCGATCCATTA	CAGCATCGCAACCCTGCCGACATTCGGCACACGCTGGCTGATGCCGCGCATTC[TC]TGATTTCGTAGAAAAACATCCCGGCATTGCGCTCAATGTCGCTTCCCGTTCCGGTGTCTTCGATTTCGAGGAGCAACCCTTCGATCTGGCGATCCATTA
Bmelitensis_Probe28	BMP28	-	-	420916	421112	61; 97	TGAAACAGGCAGGAGAGCCGGAAAATGCGAGGAATTCCTATGACAAGCCAAGACAATCCTCATGGTGGCGCCTATGGCGGCCCGGCCAGCCAGATGGCGGCCAATGTTTCTTTCGGCCAGCCTTCCGCGCCTGCAAATGGCGGTGATCTTATCAAGGACACAACAACGGCGGGTTTTCAGGCGGATGTAATTACAG	TGAAACAGGCAGGAGAGCCGGAAAATGCGAGGAATTCCTATGACAAGCCAAGACAATCCT[CT]ATGGTGGCGCCTATGGCGGCCCGGCCAGCCAGATG[GA]CGGCCAATGTTTCTTTCGGCCAGCCTTCCGCGCCTGCAAATGGCGGTGATCTTATCAAGGACACAACAACGGCGGGTTTTCAGGCGGATGTAATTACAG
Bmelitensis_Probe29	BMP29	-	-	482699	482850	100	GAACAAATTTGCCCGCATCCGCTCCTCCGGTGTGGGTGACACTGTCACTTTCGATGTCGGCGAAGGCATTCTCGACCAGCTTGTCGGCAAGAAGGCAACCTTCGATATCATCGCACGCAGCGATGATGGCAAGCTTACGCAAATGTCGGTC	GAACAAATTTGCCCGCATCCGCTCCTCCGGTGTGGGTGACACTGTCACTTTCGATGTCGGCGAAGGCATTCTCGACCAGCTTGTCGGCAAGAAGGCAAC[CT]TTCGATATCATCGCACGCAGCGATGATGGCAAGCTTACGCAAATGTCGGTC
Bmelitensis_Probe30	BMP30	-	-	634549	634918	100; 270	TCGGCACCGAGGAAATGACGGCGCGAATGATTTCGGAACTATAGGCGCCGATATTGAGCGTGAAACCGATCAGCGCGGCGGGAAATGCATCAAGATAGACACCGATGCTCGGCAGGCCATAGAAGATCACGAAAAGCTGGACGAGAAGCGGTGTGCCACGGAAAATCCAGACATAGAACCGTGCGACGGAGGATAGCCAGACGGGTGCGAAAAGACGCACGAGCGCGGTCAGCAGGCCGAGCGCAAGGCCGAAGGTAAAGGAAAGCAGGATGAGCGGAATGGTGAAGATCAACCCGGCCCAGAGAAGTGTAGGCAGGGAATCCGCCATGAGTTGAAGCCAGTCTGGCACTAGTTTCGGCTCCTTCGCAG	TCGGCACCGAGGAAATGACGGCGCGAATGATTTCGGAACTATAGGCGCCGATATTGAGCGTGAAACCGATCAGCGCGGCGGGAAATGCATCAAGATAGA[CT]ACCGATGCTCGGCAGGCCATAGAAGATCACGAAAAGCTGGACGAGAAGCGGTGTGCCACGGAAAATCCAGACATAGAACCGTGCGACGGAGGATAGCCAGACGGGTGCGAAAAGACGCACGAGCGCGGTCAGCAGGCCGAGCGCAAGGCCGAAGGTAAAGGAAAGCAGG[AG]TGAGCGGAATGGTGAAGATCAACCCGGCCCAGAGAAGTGTAGGCAGGGAATCCGCCATGAGTTGAAGCCAGTCTGGCACTAGTTTCGGCTCCTTCGCAG
Bmelitensis_Probe31	BMP31	-	-	803341	803524	42; 83; 84	CAATTGAACCAAACCTTCAATCCGCATGCCCGATGCAGGCCACATCAGGACAATTGGCCGCAGCCCGCGCACTCCTCCAAATAACACGGGCCACCCCTTCCGATCCCTTGGGAAAGCGAACAGGCGGGCACAAGGACTTGGCAAATGGTGAATATGCTTTCTGAACAGCGCGATAGCCTGCCT	CAATTGAACCAAACCTTCAATCCGCATGCCCGATGCAGGCC[AG]CATCAGGACAATTGGCCGCAGCCCGCGCACTCCTCCAAAT[AG][AG]CACGGGCCACCCCTTCCGATCCCTTGGGAAAGCGAACAGGCGGGCACAAGGACTTGGCAAATGGTGAATATGCTTTCTGAACAGCGCGATAGCCTGCCT
Bmelitensis_Probe32	BMP32	-	-	852397	852763	100; 274	GCAGAACGCGATCAAGGATGGTCTTTTTGCGGCGGAAATCACGCCGGTCAAGGTCAAGTCCGGCCGCGCCGAGGTGGAAGTTACCATTGACGAGCAGCCAGGCAAGGCAAAGCTGGACAAGATCCCCACGCTGCGCCCCGCCTTCCGCGAAGGCGGCACGGTAACGGCGGCCAATTCCTCTTCCATTTCCGATGGCGCGGCAGCACTTCTGCTCATGCGCGCATCGGAGGCAGAAAAACGTGGCCTCACCCCGCGCGCGGTCATCACCGGCCATGCAACCTATGCCGACAAGCCAAATCTCTTCTCCACGGCCCCCATTGGCGCGATCCGCAAACTGTCTGAAAAGACTGGCTGGGATTTGAAGGA	GCAGAACGCGATCAAGGATGGTCTTTTTGCGGCGGAAATCACGCCGGTCAAGGTCAAGTCCGGCCGCGCCGAGGTGGAAGTTACCATTGACGAGCAGCC[AG]GGCAAGGCAAAGCTGGACAAGATCCCCACGCTGCGCCCCGCCTTCCGCGAAGGCGGCACGGTAACGGCGGCCAATTCCTCTTCCATTTCCGATGGCGCGGCAGCACTTCTGCTCATGCGCGCATCGGAGGCAGAAAAACGTGGCCTCACCCCGCGCGCGGTCATCACCGGCCA[TC]GCAACCTATGCCGACAAGCCAAATCTCTTCTCCACGGCCCCCATTGGCGCGATCCGCAAACTGTCTGAAAAGACTGGCTGGGATTTGAAGGA
Bmelitensis_Probe33	BMP33	-	-	1120033	1120231	100	CACCTATCTTGACGCTCTGACAAACTTGACCGGACGCAACGTCGAGGCGGTAAAAGGATCAACCGGGACTTTGCTGGGTGGCAGCCGGAATTTGGCGCCCTTCCGTCCAGCCCCTCGCTCCAGATCCAATTATCTTGGCCGCGCACACCCTACCGTTATCTCGATATTCCCGTCTTTGACCAAGGCAGGTTCAGTCGC	CACCTATCTTGACGCTCTGACAAACTTGACCGGACGCAACGTCGAGGCGGTAAAAGGATCAACCGGGACTTTGCTGGGTGGCAGCCGGAATTTGGCGCC[CT]TTCCGTCCAGCCCCTCGCTCCAGATCCAATTATCTTGGCCGCGCACACCCTACCGTTATCTCGATATTCCCGTCTTTGACCAAGGCAGGTTCAGTCGC

## Sheet: A2c
Table S2c The specific fragments for B. abortus
Probes Name	Probes abbreviation	Chromosome I (NC_007618.1)		Chromosome II (NC_007624.1)		SNP	Position In This Fragment	Sequence	Sequence (with SNP)
		Start	End	Start	End	Base Change
Babortus_Probe01	BAP01	323846	324045	-	-	T-C	100	ACTTATGGCTTGGCTGTTATTGCAGCATCAACCCGACGCTTAGAAATATCGCCCATCCCAGAAATACCGCAGGAACGCTCAGGACGGCGAGCATGATGCTCAGAAAGACATAAGCCGCTTCGTTCGGCGAGCGCCGCGCTTGTTCAGGAGCCTTGTGCCATTGTGCAGGAATACCATCAAACATCGTATAAATCCTCCT	ACTTATGGCTTGGCTGTTATTGCAGCATCAACCCGACGCTTAGAAATATCGCCCATCCCAGAAATACCGCAGGAACGCTCAGGACGGCGAGCATGATGC[TC]CAGAAAGACATAAGCCGCTTCGTTCGGCGAGCGCCGCGCTTGTTCAGGAGCCTTGTGCCATTGTGCAGGAATACCATCAAACATCGTATAAATCCTCCT
Babortus_Probe02	BAP02	360287	360486	-	-	T-C	100	GTGCTTGCCGGGCTTCAGATTGTCATAAAGCAGCGTGCCGACCGGCTTCTTGGAAACAATGATCTGATCGCCCTTTTTCAGATGCTGGAGTTTTGAGGTTAGCGGGCCGTTCGGCACCTTGATCGAGAAGAATTCCAGGCCGTCTTCATAAAGGCTCGATGCGATTGAATAGGCGCGGGTCAGCGGCTTTCCGTTCACT	GTGCTTGCCGGGCTTCAGATTGTCATAAAGCAGCGTGCCGACCGGCTTCTTGGAAACAATGATCTGATCGCCCTTTTTCAGATGCTGGAGTTTTGAGGT[TC]AGCGGGCCGTTCGGCACCTTGATCGAGAAGAATTCCAGGCCGTCTTCATAAAGGCTCGATGCGATTGAATAGGCGCGGGTCAGCGGCTTTCCGTTCACT
Babortus_Probe03	BAP03	375992	376191	-	-	T-C	100	TTGCAATGATTGAGTATCTGCTCGATTAGAGAATCGGCAAGCGGAGGAGCGCAAATGGGTCAGGAGCAGAACGGTTACGGCCGCTTGAGGATGCGTATTTCCGATCAGGCCAGCGGCAAGCCTGCGGCAAATCCTTGCATGGAATTGCACCCTATCGGGAAGCGGCAGGCGGAAAATCTGGAAGAAGCACCTATCCGTG	TTGCAATGATTGAGTATCTGCTCGATTAGAGAATCGGCAAGCGGAGGAGCGCAAATGGGTCAGGAGCAGAACGGTTACGGCCGCTTGAGGATGCGTATT[TC]CCGATCAGGCCAGCGGCAAGCCTGCGGCAAATCCTTGCATGGAATTGCACCCTATCGGGAAGCGGCAGGCGGAAAATCTGGAAGAAGCACCTATCCGTG
Babortus_Probe04	BAP04	399309	399508	-	-	A-G	100	ATAAATAGTTTCTCACTGCTCGCTGAAGCGGCTCCGTCTCAAAAGACGGTTGGGCTGCTTCATTTATTTTGATTATATTTTTCCGATGCATGGCTATGGAGCAGCCTTGCCGGAAATACTCTGGAAACGGGGAAGCCCATGCAGCAAGGCGTTACGAATATTCTGCAACACTGGTTGGCAAGCTGGCGTGATTCATTGA	ATAAATAGTTTCTCACTGCTCGCTGAAGCGGCTCCGTCTCAAAAGACGGTTGGGCTGCTTCATTTATTTTGATTATATTTTTCCGATGCATGGCTATGG[AG]GCAGCCTTGCCGGAAATACTCTGGAAACGGGGAAGCCCATGCAGCAAGGCGTTACGAATATTCTGCAACACTGGTTGGCAAGCTGGCGTGATTCATTGA
Babortus_Probe05	BAP05	533192	533382	-	-	T-C	91	AACCGTTTTACAGACGGAACAGATCATCGGCATTCTGAAGGAGCACGAGGCGGGCACGCCTGTCGCGGAGCTTTGTCGCAAGCACGGCGTTAGCGATGCCAGCATCTATAAATGGAAAGCCAAGTTCGGCGGCATGGACGTGTCCGAGGCCAAGCGGTTGAAGACGCTGGAAGACGAAAACACAAAGCTG	AACCGTTTTACAGACGGAACAGATCATCGGCATTCTGAAGGAGCACGAGGCGGGCACGCCTGTCGCGGAGCTTTGTCGCAAGCACGGCGT[TC]AGCGATGCCAGCATCTATAAATGGAAAGCCAAGTTCGGCGGCATGGACGTGTCCGAGGCCAAGCGGTTGAAGACGCTGGAAGACGAAAACACAAAGCTG
Babortus_Probe06	BAP06	690358	690557	-	-	A-C	100	TCATTGTTGCGGACAAAGATCTGTGCAACCGGCTCCAGAATATGTGTGGAACTGGTGGTTGAGAACAGGATCGGCCAGCGCAATTCAAGCCCGGCCGTCACCATGGCGCGCAGTGCTTCTGACCGAACGACAGCATCGGTGAAACCCGCATTTGCCGGATCAAAATTCGTGTCTACGCGAATGGCATCGCCCCGCAGCG	TCATTGTTGCGGACAAAGATCTGTGCAACCGGCTCCAGAATATGTGTGGAACTGGTGGTTGAGAACAGGATCGGCCAGCGCAATTCAAGCCCGGCCGTC[AC]CCATGGCGCGCAGTGCTTCTGACCGAACGACAGCATCGGTGAAACCCGCATTTGCCGGATCAAAATTCGTGTCTACGCGAATGGCATCGCCCCGCAGCG
Babortus_Probe07	BAP07	815388	815550	-	-	C-G	63	CCACCGTTGCCGCCACGCTTATCTTCCTGCTCTATTATTATCTGACGCAGGTAAGCGGTCTCCGACTGGACGATATTCCCCATTTCTTCCCCGATCTGACATAAGGCTTCTCCGCCAGAACCGGAAATTTGAGGCTGCCCGAGATTGGGGCCTTTTCGAGCC	CCACCGTTGCCGCCACGCTTATCTTCCTGCTCTATTATTATCTGACGCAGGTAAGCGGTCTC[CG]GACTGGACGATATTCCCCATTTCTTCCCCGATCTGACATAAGGCTTCTCCGCCAGAACCGGAAATTTGAGGCTGCCCGAGATTGGGGCCTTTTCGAGCC
Babortus_Probe08	BAP08	865129	865328	-	-	A-G	100	TGCCGACGACATTGCCTACAATGCGCATGACATTGATGATGGCTTGCGGGCAGGGCTCTTGACCCTCGAATCGCTGGACGAAGTACCGCTCGCCAAACGACTGCTTGATATTGTGCGGACACGTTATCCCAATCTCGACCCCGTCCGCACTGGACACGAACTGGTGCGCCGCCAGATCACGATCATGGTGGAAGACGTG	TGCCGACGACATTGCCTACAATGCGCATGACATTGATGATGGCTTGCGGGCAGGGCTCTTGACCCTCGAATCGCTGGACGAAGTACCGCTCGCCAAACG[AG]CTGCTTGATATTGTGCGGACACGTTATCCCAATCTCGACCCCGTCCGCACTGGACACGAACTGGTGCGCCGCCAGATCACGATCATGGTGGAAGACGTG
Babortus_Probe09	BAP09	881152	881317	-	-	A-G	68	CCCTGATGGTAGGGGTAACGACTTAACATGCTAACGCGGAAGCGAAAAGTGTGCGACCTTGGCGCAGACGGGTTCATCGCCGGTTGCAATTGAAGCACCAACCATTGTAATGCCGTTAATAATTTTGTCTTCGTGACTTCAGAGGAGTTCCTAATGTTCGTAACA	CCCTGATGGTAGGGGTAACGACTTAACATGCTAACGCGGAAGCGAAAAGTGTGCGACCTTGGCGCAG[AG]CGGGTTCATCGCCGGTTGCAATTGAAGCACCAACCATTGTAATGCCGTTAATAATTTTGTCTTCGTGACTTCAGAGGAGTTCCTAATGTTCGTAACA
Babortus_Probe10	BAP10	1355923	1356101	-	-	A-C	79	TTTTCTGCAAGGCGCCAAACAGATAGAATGACGTTACGGAGGCCAATGATGCGAAACGAAAGCATACCGGTTATACGCAGCATTCCCACCAGTCGCGACGATGTTTTCGCCTTCGCTATCGAAGGGCATCTGGATGACGCATCGCTGGAAAACCTCTACGGACTGCTGGATGCGGCCT	TTTTCTGCAAGGCGCCAAACAGATAGAATGACGTTACGGAGGCCAATGATGCGAAACGAAAGCATACCGGTTATACGC[AC]GCATTCCCACCAGTCGCGACGATGTTTTCGCCTTCGCTATCGAAGGGCATCTGGATGACGCATCGCTGGAAAACCTCTACGGACTGCTGGATGCGGCCT
Babortus_Probe11	BAP11	1411145	1411318	-	-	C-T	74	CCGGTAATTTCCACTTCACCGGCCTCGCCGGGGGCCAGCTCATTAAAGAGAGCGATTTCCTTCAGTTTCATGGCCATACCAAATCCAGGTTCAGTTGCGTGCACGTCGATACAGAGACAGCCTTATGCGAATCAATCGTATTCGTTTGAAACCATTGCTGGCGGCACTTCCTG	CCGGTAATTTCCACTTCACCGGCCTCGCCGGGGGCCAGCTCATTAAAGAGAGCGATTTCCTTCAGTTTCATGG[CT]CATACCAAATCCAGGTTCAGTTGCGTGCACGTCGATACAGAGACAGCCTTATGCGAATCAATCGTATTCGTTTGAAACCATTGCTGGCGGCACTTCCTG
Babortus_Probe12	BAP12	1423697	1423883	-	-	T-C	87	ATTGCAGTACGAAATCTTCTTTTGTTGCAGCCGTTTTCCGCTTAGATTCCAGTCTCTACCAGCGCGCGCCCGGCCCATGTCGGACGTATACGAAGGAGACAGACCAATGGGACTTACGCGATCTTTGAATGTCCTCATGATCTGTGCGGCATTTGCATTTGTTGCAGCGTTGATAGCAGGCGTCAT	ATTGCAGTACGAAATCTTCTTTTGTTGCAGCCGTTTTCCGCTTAGATTCCAGTCTCTACCAGCGCGCGCCCGGCCCATGTCGGACG[TC]ATACGAAGGAGACAGACCAATGGGACTTACGCGATCTTTGAATGTCCTCATGATCTGTGCGGCATTTGCATTTGTTGCAGCGTTGATAGCAGGCGTCAT
Babortus_Probe13	BAP13	1432495	1432658	-	-	G-A; C-A	63; 64	ACATCCATGTCCGAAGACGGGCCTTCCTTTGCCTCGTCAAAGCTTTGGTTTCATCCCTACAGGCCGCCTGTCGTTCTGGTATTGCTGGTCATTTTCGCGACCGGATTCATCCTTTCAAAGGGACCGCGTATCATCGCCGATATGCTGGTAAACCTTGAATTTC	ACATCCATGTCCGAAGACGGGCCTTCCTTTGCCTCGTCAAAGCTTTGGTTTCATCCCTACAG[GA][CA]CGCCTGTCGTTCTGGTATTGCTGGTCATTTTCGCGACCGGATTCATCCTTTCAAAGGGACCGCGTATCATCGCCGATATGCTGGTAAACCTTGAATTTC
Babortus_Probe14	BAP14	1433826	1433992	-	-	G-A	100	GCTTGAATCAGCATAACGGAAGCCGGTTCACAAGTTTTGAGATTTTGTGGCAAACCATTGAGATAAAGGGATAAGCCGCGCTTCTGGAAGACAAAGGGAGCATCGGATCGGGCCCAGGTCGCTGAGAGAACAGCAAAGGCCGGTCCAGAGATGAAAGCAAAGGTTC	GCTTGAATCAGCATAACGGAAGCCGGTTCACAAGTTTTGAGATTTTGTGGCAAACCATTGAGATAAAGGGATAAGCCGCGCTTCTGGAAGACAAAGGGA[GA]CATCGGATCGGGCCCAGGTCGCTGAGAGAACAGCAAAGGCCGGTCCAGAGATGAAAGCAAAGGTTC
Babortus_Probe15	BAP15	1417053	1417252	-	-	T-C	100	CGAGCGCATATAGGCCTTGACCGAATTGCAATATTTTGCGGAGGTCGGGTTCATGCGCTTTGCGCCGTGACCGGCATTATATTTCAGGATGGTGCCGCATGTGCTGCCGCCGCCAAGCTTCTGCGCCATGGCGAGATATTTCATGCCGAACTGGATATTCGTGGCAGGCTCATAAAGCCCCTTGGCCGAGCCCGTATAG	CGAGCGCATATAGGCCTTGACCGAATTGCAATATTTTGCGGAGGTCGGGTTCATGCGCTTTGCGCCGTGACCGGCATTATATTTCAGGATGGTGCCGCA[TC]GTGCTGCCGCCGCCAAGCTTCTGCGCCATGGCGAGATATTTCATGCCGAACTGGATATTCGTGGCAGGCTCATAAAGCCCCTTGGCCGAGCCCGTATAG
Babortus_Probe16	BAP16	1503779	1503973	-	-	C-T; G-A	20; 151	CACCTTGCATCACGAGTTGCTCAATCAGCGCGGAGAAACCGTCTGTGAAATGCAGCATCCCTGCATGATGCTGCTCCGCGAATACGCAACAGCTATGGGAAATGCTGCGGGGAGAGGTTCGCTATGAGCTTCATCGAAGAGAATATCGGCGAGGAACGGGTTCTCGGCACCTACACCTTTACCGCTGAGGAAAT	CACCTTGCATCACGAGTTG[CT]TCAATCAGCGCGGAGAAACCGTCTGTGAAATGCAGCATCCCTGCATGATGCTGCTCCGCGAATACGCAACAGCTATGGGAAATGCTGCGGGGAGAGGTTCGCTATGAGCTTCATCGAAGAGAATATCGGC[GA]AGGAACGGGTTCTCGGCACCTACACCTTTACCGCTGAGGAAAT
Babortus_Probe17	BAP17	1867336	1867516	-	-	T-C	81	GCATCGCGTTTCCTTCATTGCGCGTCGTTCACGCGCAGGCTGACATTACAGAACCAGAGCCAGAAGCATAATACCGAGCCTCACCAGACTAATGAGCCAGACGAAGGAACGGAGATAGGGAATGCCCGCCAGGTAAAGCGGAATATAGACAATGCGGCTGAAAAACCAGAGCCACGCCCC	GCATCGCGTTTCCTTCATTGCGCGTCGTTCACGCGCAGGCTGACATTACAGAACCAGAGCCAGAAGCATAATACCGAGCC[TC]CACCAGACTAATGAGCCAGACGAAGGAACGGAGATAGGGAATGCCCGCCAGGTAAAGCGGAATATAGACAATGCGGCTGAAAAACCAGAGCCACGCCCC
Babortus_Probe18	BAP18	1943933	1944080	-	-	A-G	90	TTTGTGACAGATTGAAATTCACAACACAACCCGGTTGTTTCGCTTATGTAAAATTAAAGTTTCGGCTATTCTGTGCTCCGTTGGAACTTACAGTGAATCTGGCTTGACCTCGCTGGAACCACTGGGCGAAGGTTATCTCGAACCACC	TTTGTGACAGATTGAAATTCACAACACAACCCGGTTGTTTCGCTTATGTAAAATTAAAGTTTCGGCTATTCTGTGCTCCGTTGGAACTT[AG]CAGTGAATCTGGCTTGACCTCGCTGGAACCACTGGGCGAAGGTTATCTCGAACCACC
Babortus_Probe19	BAP19	1963885	1964084	-	-	A-G	100	CGTGCGCGGGCTCATCACGGTTGAAAGATCGCCGTTGATGAAAGCCTGGCGCGTCATGTCGGCCACGCGCACCATCTTGTTCACGATCTCGCGGCCTTCAGCATTCTGGTAATGCTTGGCCTTGACGAGAACGATATTCACTTCATTGTCGTGCGGCAGATAGTTCAGCGTCGTCACGATGGACCAGCGGTCCATCTGC	CGTGCGCGGGCTCATCACGGTTGAAAGATCGCCGTTGATGAAAGCCTGGCGCGTCATGTCGGCCACGCGCACCATCTTGTTCACGATCTCGCGGCCTTC[AG]GCATTCTGGTAATGCTTGGCCTTGACGAGAACGATATTCACTTCATTGTCGTGCGGCAGATAGTTCAGCGTCGTCACGATGGACCAGCGGTCCATCTGC
Babortus_Probe20	BAP20	1965608	1965766	-	-	T-C	92	ATCGGATTATGCGGATTAAGAGTGGCTAAACAAGAATTGACATTTCGCTCAATCTGGCTTTGAGCCATCTCAACACGGCGAAATTTTGAAGTGGGTAACTTTCCTGTGCGGATTTGCCCCACCTTTTGCAGCCGAAGCAGCGTTATATGAGGCGCAGC	ATCGGATTATGCGGATTAAGAGTGGCTAAACAAGAATTGACATTTCGCTCAATCTGGCTTTGAGCCATCTCAACACGGCGAAATTTTGAAG[TC]GGGTAACTTTCCTGTGCGGATTTGCCCCACCTTTTGCAGCCGAAGCAGCGTTATATGAGGCGCAGC
Babortus_Probe21	BAP21	2009287	2009457	-	-	A-C	71	GCTCTGGCGCCATGTTTCGATTGCACACATGACCATGCGTGATCTCGATGCGGGGTTTATTGGCCGCTATATTGGCCGTGTCGGCGATATTGCGCTTTCGAGTGTGGGAGCCTATCAGGTCGAAGGGCCGGGAATTCAGCTTTTCGAGAAGATCGACGGCGATTATTTTA	GCTCTGGCGCCATGTTTCGATTGCACACATGACCATGCGTGATCTCGATGCGGGGTTTATTGGCCGCTAT[AC]TTGGCCGTGTCGGCGATATTGCGCTTTCGAGTGTGGGAGCCTATCAGGTCGAAGGGCCGGGAATTCAGCTTTTCGAGAAGATCGACGGCGATTATTTTA
Babortus_Probe22	BAP22	2049748	2049929	-	-	C-T	82	TCGGCATAATAGAGCTTGGAAGGACGGCCGGCATAAAAGGTGGAAAGGGCGTTCAACTCCGCCTTGAATTCGGGGTCATTCCTCGCCGTTTCATAAGCCTGCTGCAATTCGAGGATCAGAGGCATCAGCGTTTCGGCGACGAAGCGGCCACCGAATATGCCGAACATGCCCTCTTCGTCAG	TCGGCATAATAGAGCTTGGAAGGACGGCCGGCATAAAAGGTGGAAAGGGCGTTCAACTCCGCCTTGAATTCGGGGTCATTC[CT]TCGCCGTTTCATAAGCCTGCTGCAATTCGAGGATCAGAGGCATCAGCGTTTCGGCGACGAAGCGGCCACCGAATATGCCGAACATGCCCTCTTCGTCAG
Babortus_Probe23	BAP23	-	-	139034	139233	T-C	100	CGTCCTGCAATCCAGCGCCAATGCATAATGCAGGGCGATATCGACATTGTCGCGGAATTCCTGTTCGCGACCCGAAATAGCTGCCATGCCGCGTTCGCCTGCAGCCCAATCGCCGGGAGGCATGTTGAAAAGAACCTGCGTGAGATTGTGCTGCTTCAATTCCCTGGCAATGACATCAGCGTCGAAGTCATAAGGAAAC	CGTCCTGCAATCCAGCGCCAATGCATAATGCAGGGCGATATCGACATTGTCGCGGAATTCCTGTTCGCGACCCGAAATAGCTGCCATGCCGCGTTCGCC[TC]GCAGCCCAATCGCCGGGAGGCATGTTGAAAAGAACCTGCGTGAGATTGTGCTGCTTCAATTCCCTGGCAATGACATCAGCGTCGAAGTCATAAGGAAAC
Babortus_Probe24	BAP24	-	-	200184	200329	T-C	58	GGTGCCAAGCCCCAGTCGTTTGAACAGGGGCGCGGCGATGATAGCACCTCCCAGAATTATCAGGCTCTGTAGGTAAAGGCTCCCGCCATTTGCGACCATACTGTGCTCTTGGTATTTGAAGATTGTAGATGAGGTTGCCTTGAAG	GGTGCCAAGCCCCAGTCGTTTGAACAGGGGCGCGGCGATGATAGCACCTCCCAGAAT[TC]ATCAGGCTCTGTAGGTAAAGGCTCCCGCCATTTGCGACCATACTGTGCTCTTGGTATTTGAAGATTGTAGATGAGGTTGCCTTGAAG
Babortus_Probe25	BAP25	-	-	792389	792624	A-C; T-C	100; 136	AAACCGGATGCTGCGGGAATTGCGGGAAGACAACCTGCTTGTCTTCAAGAACAATGAAGTCAGGTTCCTGAACCGCCCGGCATTGATGCAGGTTTGCAGATTCGACGAGAATTATCTGTCAGCAAATATCTTCACTAACATCCACTTGATCCCACGATAATCACTTGCCGCAAGCTGTTGCTGCTCTTGCGCTGTCAAAAGCGAAATCCGCATCCTGATTGAGACAATATTCTCC	AAACCGGATGCTGCGGGAATTGCGGGAAGACAACCTGCTTGTCTTCAAGAACAATGAAGTCAGGTTCCTGAACCGCCCGGCATTGATGCAGGTTTGCAG[AC]TTCGACGAGAATTATCTGTCAGCAAATATCTTCAC[TC]AACATCCACTTGATCCCACGATAATCACTTGCCGCAAGCTGTTGCTGCTCTTGCGCTGTCAAAAGCGAAATCCGCATCCTGATTGAGACAATATTCTCC
Babortus_Probe26	BAP26	-	-	871133	871310	T-C	78	TCCATCACAGCCTTTTTCAACGCGCACCAGTCATCCTGGGTCGGGATCGCAATGCCGGCATCCTCGAATATCCGGCGTACCTTTTCCGTGGCCGGAGCCCATGCCTGATCTGTATATTTGTCGAAATATTCACCCGAGGCATATTTGGATTTTTCAAATCCCTTGAAGGATTTTCCG	TCCATCACAGCCTTTTTCAACGCGCACCAGTCATCCTGGGTCGGGATCGCAATGCCGGCATCCTCGAATATCCGGCG[TC]ACCTTTTCCGTGGCCGGAGCCCATGCCTGATCTGTATATTTGTCGAAATATTCACCCGAGGCATATTTGGATTTTTCAAATCCCTTGAAGGATTTTCCG
Babortus_Probe27	BAP27	-	-	1102078	1102277	T-C	100	CAAATTGCGCGGCGATTTCCCGAATGAAAATCTTACACAGGAGAAGGTTCTTGCCGCTGCAATTGGCAAGCCTGCAACCAACGCGGCCTAGTTTTTGAATATTTGTCCGCAGCGAGAGCATGTCTCCCGAAAGTGGAAACCGGTTTCGGGAGACATGCGTAAAAACAAATGGTTATAGCGGTTCCAGCGGCTCCGCTTT	CAAATTGCGCGGCGATTTCCCGAATGAAAATCTTACACAGGAGAAGGTTCTTGCCGCTGCAATTGGCAAGCCTGCAACCAACGCGGCCTAGTTTTTGAA[TC]ATTTGTCCGCAGCGAGAGCATGTCTCCCGAAAGTGGAAACCGGTTTCGGGAGACATGCGTAAAAACAAATGGTTATAGCGGTTCCAGCGGCTCCGCTTT
Babortus_Probe28	BAP28	-	-	1110908	1111076	T-C	69	TTCGCTGCGGCCGATCTCGATATATTCCAGCACTTTCTTTTCATGAACCGGATGGATCAGAGGGCCAATAACCGTTTCAGGATCGAGCGGATGGCCGACCTTGATACGCTTTGCCTTTTCAGCGACCAGCGCGGTGAATTTTTCATAGATGCTTGCTTCCACCAGCAG	TTCGCTGCGGCCGATCTCGATATATTCCAGCACTTTCTTTTCATGAACCGGATGGATCAGAGGGCCAA[TC]AACCGTTTCAGGATCGAGCGGATGGCCGACCTTGATACGCTTTGCCTTTTCAGCGACCAGCGCGGTGAATTTTTCATAGATGCTTGCTTCCACCAGCAG

[truncated: 5 more sheets: A2d, A2e, A3, A4, A5]
